# Supplementary material for: A new class of cationic cyclodextrins: synthesis and chemico-physical properties
Source: Royal Society of Chemistry journal article supplement (doi:10.1039/c0nj00021c), 2010-01-01

# SUPPLEMENTARY DATA

## A new Class of cationic Cyclodextrins: Synthesis and chemico-physical Properties

Luisa Boffa,<sup>a</sup> Emanuela Calcio Gaudino,<sup>a</sup> Katia Martina,<sup>a</sup> László Jicsinszky,<sup>b</sup> and Giancarlo Cravotto\*<sup>a</sup>

<sup>a</sup> Dipartimento di Scienza e Tecnologia del Farmaco, Università di Torino, Via P. Giuria 9, 10125 Torino, Italy. Fax: +39 011 6707687; Tel: +39 011 6707684; E-mail: giancarlo.cravotto@unito.it

<sup>b</sup> Cyclolab R&D Laboratory, Illatos út 7, H-1097 Budapest, Hungary

### Table of contents

|                        |         |
|------------------------|---------|
| <b>-Syntheses</b>      | pag. 2  |
| <b>-NMR spectra</b>    | pag. 6  |
| -2                     | pag. 6  |
| -7                     | pag. 7  |
| -BuPrImBr              | pag. 8  |
| -BuPrImPF <sub>6</sub> | pag. 9  |
| -BuPeImCl              | pag. 10 |
| -BuPeImPF <sub>6</sub> | pag. 10 |
| -8                     | pag. 12 |
| -9                     | pag. 15 |
| -10                    | pag. 17 |
| -11                    | pag. 20 |
| -3                     | pag. 22 |
| -4                     | pag. 24 |
| -5                     | pag. 26 |
| -6                     | pag. 29 |
| <b>-DSC analyses</b>   | pag. 33 |

## Syntheses

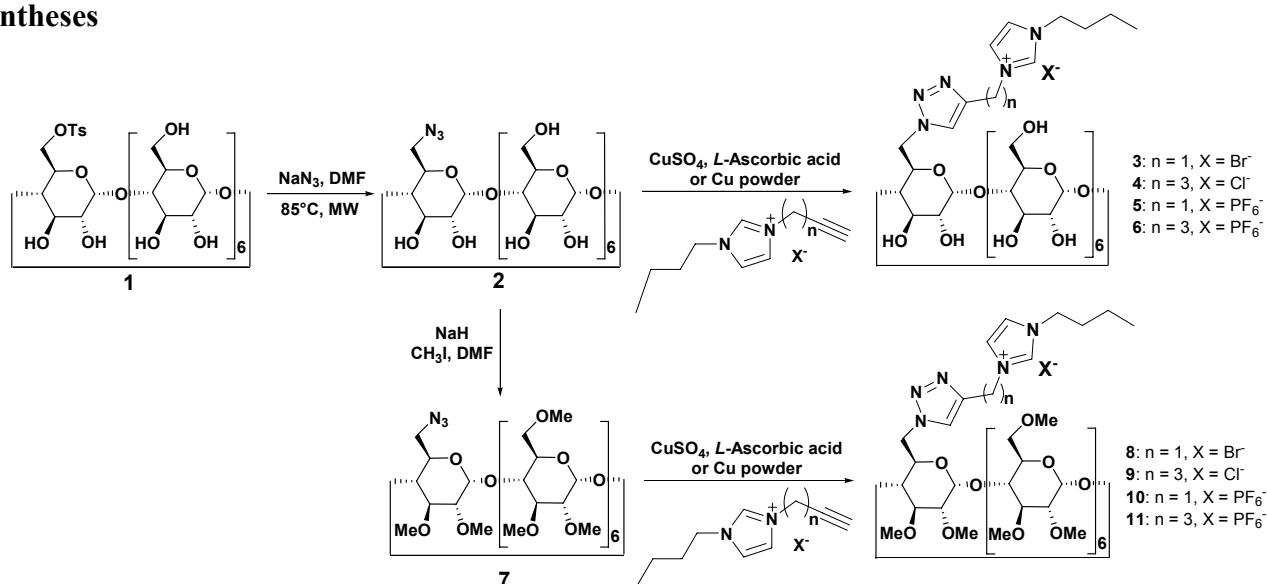

Scheme 2.

**6<sup>1</sup>-azido-6<sup>1</sup>-deoxy-β-CD (2).** Sodium azide (454 mg, 6.98 mmol, 1.5 equiv.) was suspended in DMF (100 mL), and 6<sup>1</sup>-*O*-tosyl-β-CD (1) (6 g, 4.65 mmol) was added. The mixture was irradiated with MW at 85 °C (200 W) for 30 min; then acetone was added and the formed precipitate was filtered. After crystallization from water-acetone 9:1, 4.07 g of pure 2 as a white powder were obtained (3.51 mmol, 75.5%). *R<sub>f</sub>* (*i*-Prop-OH/H<sub>2</sub>O/EtOAc/NH<sub>3</sub> 5:3:1:1) = 0.49; mp decomposition over 221 °C; FTIR (KBr)  $\nu/\text{cm}^{-1}$  = 3400, 2104 (N<sub>3</sub>), 1663, 1437, 1412, 1333, 1300, 1157, 1030, 915. <sup>1</sup>H NMR (300 MHz, D<sub>6</sub>-DMSO):  $\delta$  5.56-5.76 (m, 14H, 2,3-OH), 4.87-4.81 (br, 7H, 1-H), 4.4-4.56 (m, 6H, 6-OH), 3.48-3.81 (overlapped signals, 28H, 3,5,6-H), 3.23-3.44 (overlapped signals, 14H, 2,4-H). <sup>13</sup>C NMR (75 MHz, D<sub>6</sub>-DMSO):  $\delta$  102.3-101.6 (1-CH), 83.0-81.4 (4-CH), 73.1-72.0 (2,3,5-CH), 70.2 (5-CH near 6-CH<sub>2</sub>N<sub>3</sub>), 60.2-59.8 (6-CH<sub>2</sub>), 51.1 (6-CH<sub>2</sub>N<sub>3</sub>). MALDI-TOF MS (M+K)<sup>+</sup> *m/z* (%) calcd for [C<sub>42</sub>H<sub>69</sub>KN<sub>3</sub>O<sub>34</sub>]: 1198.34, found: 1198.59.

**6<sup>1</sup>-azido-6<sup>1</sup>-deoxy-2<sup>1-VII</sup>,3<sup>1-VII</sup>,6<sup>1-VII</sup>-*O*-permethyl-β-CD (7).** Compound 2 (3 g, 2.59 mmol) was dissolved in 50 mL of anhydrous DMF and cooled to 0 °C in an ice bath. NaH was added (103.6 mmol, 40 equiv., 60% in mineral oils) and a white precipitate was formed. To this suspension 6.45 mL of MeI (103.6 mmol, 40 equiv., *d* = 2.28, 14.7 g) were added dropwise. The suspension was warmed to rt and kept in magnetical stirring for 3 h. The reaction mixture was filtered and the salts were washed with diethyl ether. The DMF was poured into water (100 mL) and extracted with diethyl ether (5 x 30 mL). The organic layers were collected, washed with brine solution, dried with anhydrous Na<sub>2</sub>SO<sub>4</sub> and evaporated to give 3.8 g of crude product. The obtained product was purified by Flash Chromatography, using CH<sub>2</sub>Cl<sub>2</sub>, CH<sub>2</sub>Cl<sub>2</sub>/MeOH 99:1, 98:2, 95:5, 9:1, MeOH as eluents on 24g-silica gel column; 3.17 g of pure product as white powder were obtained (2.2 mmol, 85%). *R<sub>f</sub>* (CHCl<sub>3</sub>/CH<sub>3</sub>OH 95:5) = 0.72; mp = 107 °C; FTIR (KBr)  $\nu/\text{cm}^{-1}$  = 2930, 2836, 2101 (N<sub>3</sub>), 1640, 1458, 1369, 1145, 1036, 970, 857, 756. <sup>1</sup>H NMR (300 MHz, CDCl<sub>3</sub>):  $\delta$  5.14-5.09 (overlapped signals, 6H, 1-H), 5.05 (d, 1H, 1-H), 4.00-3.70 (overlapped signals, 15H, 5,6-H), 3.70-3.45 (overlapped signals, 80H, 3,4,6-H, 2,3,6-OCH<sub>3</sub>), 3.18 (dd, 7H, 2-H). <sup>13</sup>C NMR (75 MHz, CDCl<sub>3</sub>):  $\delta$  99.5-98.5 (1-CH), 82.2-81.5 (2,3-CH), 80.5-80.2 (4-CH), 71.7-71.2 (6-CH<sub>2</sub>), 71.1-70.97 (5-CH), 61.7-61.5 (3-OCH<sub>3</sub>), 59.2-58.6 (2,6-OCH<sub>3</sub>), 52.2 (6-CH<sub>2</sub>N<sub>3</sub>). ESI MS (M+Na)<sup>+</sup> *m/z* (%) calcd for [C<sub>62</sub>H<sub>109</sub>N<sub>3</sub>NaO<sub>34</sub>]: 1463.52, found: 1463.63.

**1-butyl-3-propargylimidazolium bromide.** 0.75 mL of 1-butylimidazole (0.708 g, 5.7 mmol, *d* = 0.945) were introduced in a 25 mL two-necked round-bottomed flask and cooled to 0 °C in an ice bath; 0.76 mL of propargyl bromide (0.814 g, 6.84 mmol, 1.2 equiv., *d* = 1.335, 80% in toluene) were added in nitrogen atmosphere. The reaction mixture was warmed to room temperature and irradiated with MW at 60 °C for 0.5 h (mean power 50 W). The crude mixture was washed with cyclohexane and dried under vacuum to give 1.17 g of ionic liquid (4.8 mmol, 84.3%) as a deliquescent solid. FTIR (film)  $\nu/\text{cm}^{-1}$  = 3076, 2961, 2874, 2124 (alkyne), 1560, 1464, 1441, 1356, 1339, 1161, 1115, 1024, 951, 864, 754. <sup>1</sup>H NMR (300 MHz, CDCl<sub>3</sub>):  $\delta$  10.43 (s, 1H, H-Im), 7.66 (s, 1H, *J* = 1.5 Hz, H-Im), 7.51 (s, 1H, *J* = 1.5 Hz, H-Im), 5.44 (d, 2H, *J* = 2.7 Hz, -CH<sub>2</sub>C≡CH), 4.34 (t, 2H, -CH<sub>2</sub>CH<sub>2</sub>CH<sub>2</sub>CH<sub>3</sub>), 2.75 (t, 1H, *J* = 2.7 Hz, -CH<sub>2</sub>C≡CH), 1.9 (m, 2H, -CH<sub>2</sub>CH<sub>2</sub>CH<sub>2</sub>CH<sub>3</sub>), 1.38 (m, 2H, -CH<sub>2</sub>CH<sub>2</sub>CH<sub>2</sub>CH<sub>3</sub>), 0.96 (t, 3H, -CH<sub>2</sub>CH<sub>2</sub>CH<sub>2</sub>CH<sub>3</sub>). <sup>13</sup>C NMR (75 MHz, CDCl<sub>3</sub>):  $\delta$  135.8 (2-CH Im), 122.6 (4-CH Im), 122.0 (5-CH Im), 77.9 (-CH<sub>2</sub>C≡CH), 74.2 (-CH<sub>2</sub>C≡CH), 49.8 (-CH<sub>2</sub>CH<sub>2</sub>CH<sub>2</sub>CH<sub>3</sub>), 39.6 (-CH<sub>2</sub>C≡CH), 31.8 (-CH<sub>2</sub>CH<sub>2</sub>CH<sub>2</sub>CH<sub>3</sub>), 19.1 (-CH<sub>2</sub>CH<sub>2</sub>CH<sub>2</sub>CH<sub>3</sub>), 13.2 (-CH<sub>2</sub>CH<sub>2</sub>CH<sub>2</sub>CH<sub>3</sub>). ESI MS (M-Br)<sup>+</sup> *m/z* (%) calcd for C<sub>10</sub>H<sub>15</sub>N<sub>2</sub><sup>+</sup>: 163.24, found: 163.50.

**1-butyl-3-propargylimidazolium hexafluorophosphate.** In a 25 mL two-necked round-bottomed flask, 1.06 mL of 1-butylimidazole (1 g, 8.053 mmol, *d* = 0.945), 0.985 mL of propargyl bromide (1.32 g, 8.86 mmol, 1.1 equiv., *d* = 1.34, 80% in toluene) and 1.482 g of potassium hexafluorophosphate (8.05 mmol, 1 equiv.) were introduced in nitrogen atmosphere. The

reaction mixture was irradiated with MW at 60 °C for 1 h (mean power 40 W). The crude mixture was washed with acetone, filtered on a celite pad and dried under vacuum. The ionic liquid obtained was washed with water and cyclohexane to give 1.62 g of ionic liquid as a brown liquid (5.26 mmol, 65.3%).

FTIR (film)  $\nu/\text{cm}^{-1}$  = 3291, 3162, 2966, 2139 (alkyne), 1611, 1566, 1468, 1445, 1341, 1161, 1111, 839, 741.  $^1\text{H}$  NMR (300 MHz, acetone- $D_6$ ):  $\delta$  9.20 (s, 1H, H-Im), 7.85 (s, 1H, H-Im), 7.83 (s, 1H, H-Im), 5.30 (d, 2H,  $J$  = 2.4 Hz,  $-\text{CH}_2\text{C}\equiv\text{CH}$ ), 4.37 (t, 2H,  $-\text{CH}_2\text{CH}_2\text{CH}_2\text{CH}_3$ ), 3.36 (t, 1H,  $J$  = 2.7 Hz,  $-\text{CH}_2\text{C}\equiv\text{CH}$ ), 1.95 (m, 2H,  $-\text{CH}_2\text{CH}_2\text{CH}_2\text{CH}_3$ ), 1.38 (m, 2H,  $-\text{CH}_2\text{CH}_2\text{CH}_2\text{CH}_3$ ), 0.95 (t, 3H,  $-\text{CH}_2\text{CH}_2\text{CH}_2\text{CH}_3$ ).  $^{13}\text{C}$  NMR (75 MHz, acetone- $D_6$ ):  $\delta$  137.9 (2-CH Im), 123.8 (4-CH Im), 123.3 (5-CH Im), 78.6 ( $-\text{CH}_2\text{C}\equiv\text{CH}$ ), 75.6 ( $-\text{CH}_2\text{C}\equiv\text{CH}$ ), 50.5 ( $-\text{CH}_2\text{CH}_2\text{CH}_2\text{CH}_3$ ), 39.8 ( $-\text{CH}_2\text{C}\equiv\text{CH}$ ), 32.6 ( $-\text{CH}_2\text{CH}_2\text{CH}_2\text{CH}_3$ ), 19.9 ( $-\text{CH}_2\text{CH}_2\text{CH}_2\text{CH}_3$ ), 13.6 ( $-\text{CH}_2\text{CH}_2\text{CH}_2\text{CH}_3$ ). ESI MS ( $\text{M-PF}_6$ ) $^+$   $m/z$  (%) calcd for  $[\text{C}_{10}\text{H}_{15}\text{N}_2]^+$ : 163.24, found: 163.0.

**1-butyl-3-(4-pentynyl)imidazolium chloride.** 1.06 mL of 1-butylimidazole (1 g, 8.05 mmol,  $d$  = 0.945) were introduced in a 25 mL two-necked round-bottomed flask and cooled to 0 °C in an ice bath; 1.02 mL of 5-chloro-1-pentyne (991 mg, 9.66 mmol, 1.2 equiv.,  $d$  = 0.968) were added in nitrogen atmosphere. The reaction mixture was warmed to room temperature and irradiated with MW at 110 °C for 1 h (mean power 120 W). The crude mixture was washed with cyclohexane and dried under vacuum to give 1.71 g of ionic liquid as a brown liquid (7.55 mmol, 94%).

FTIR (film)  $\nu/\text{cm}^{-1}$  = 3096, 2963, 2936, 2874, 2123 (alkyne), 1654, 1564, 1464, 1334, 1163, 1111, 1028, 951, 861, 754.  $^1\text{H}$  NMR (300 MHz,  $\text{CDCl}_3$ ):  $\delta$  10.97 (s, 1H, H-Im), 7.39 (s, 1H,  $J$  = 1.5 Hz, H-Im), 7.30 (s, 1H,  $J$  = 1.5 Hz, H-Im), 4.57 (t, 2H,  $-\text{CH}_2\text{CH}_2\text{CH}_2\text{C}\equiv\text{CH}$ ), 4.37 (t, 2H,  $-\text{CH}_2\text{CH}_2\text{CH}_2\text{CH}_3$ ), 2.36 (m, 2H,  $-\text{CH}_2\text{CH}_2\text{CH}_2\text{C}\equiv\text{CH}$ ), 2.22 (m, 2H,  $-\text{CH}_2\text{CH}_2\text{CH}_2\text{C}\equiv\text{CH}$ ), 2.08 (t, 1H,  $J$  = 2.9 Hz,  $-\text{CH}_2\text{CH}_2\text{CH}_2\text{C}\equiv\text{CH}$ ), 1.92 (m, 2H,  $-\text{CH}_2\text{CH}_2\text{CH}_2\text{CH}_3$ ), 1.42 (m, 2H,  $-\text{CH}_2\text{CH}_2\text{CH}_2\text{CH}_3$ ), 0.98 (t, 3H,  $-\text{CH}_2\text{CH}_2\text{CH}_2\text{CH}_3$ ).  $^{13}\text{C}$  NMR (75 MHz,  $\text{CDCl}_3$ ):  $\delta$  136.3 (2-CH Im), 122.3 (4-CH Im), 122.0 (5-CH Im), 81.3 ( $-\text{CH}_2\text{CH}_2\text{CH}_2\text{C}\equiv\text{CH}$ ), 70.2 ( $-\text{CH}_2\text{CH}_2\text{CH}_2\text{C}\equiv\text{CH}$ ), 49.3 ( $-\text{CH}_2\text{CH}_2\text{CH}_2\text{C}\equiv\text{CH}$ ), 48.2 ( $-\text{CH}_2\text{CH}_2\text{CH}_2\text{CH}_3$ ), 31.7 ( $-\text{CH}_2\text{CH}_2\text{CH}_2\text{CH}_3$ ), 28.2 ( $-\text{CH}_2\text{CH}_2\text{CH}_2\text{C}\equiv\text{CH}$ ), 19.0 ( $-\text{CH}_2\text{CH}_2\text{CH}_2\text{C}\equiv\text{CH}$ ), 15.0 ( $-\text{CH}_2\text{CH}_2\text{CH}_2\text{CH}_3$ ), 13.0 ( $-\text{CH}_2\text{CH}_2\text{CH}_2\text{CH}_3$ ). ESI MS ( $\text{M-Cl}$ ) $^+$   $m/z$  (%) calcd for  $\text{C}_{12}\text{H}_{19}\text{N}_2^+$ : 191.29, found: 191.5.

**1-butyl-3-(4-pentynyl)imidazolium hexafluorophosphate.** 1.06 mL of 1-butylimidazole (1 g, 8.05 mmol,  $d$  = 0.945) were introduced in a 25 mL two-necked round-bottomed flask and cooled to 0 °C in an ice bath; 1.02 mL of 5-chloro-1-pentyne (991 mg, 9.66 mmol, 1.2 equiv.,  $d$  = 0.968) and 1.48 g of potassium hexafluorophosphate (8.05 mmol, 1 equiv.) were added in nitrogen atmosphere. The reaction mixture was warmed to room temperature and irradiated with MW at 110 °C for 1 h (mean power 110 W). The crude mixture was washed with acetone, filtered on a celite pad and dried under vacuum. The ionic liquid obtained was washed with water and cyclohexane to give 1.54 g of ionic liquid as a brown oil (4.58 mmol, 57%). FTIR (film)  $\nu/\text{cm}^{-1}$  = 3295, 3164, 2964, 2878, 2120 (alkyne), 1709, 1611, 1566, 1468, 1366, 1161, 1111, 1028, 861, 777, 752.  $^1\text{H}$  NMR (300 MHz, acetone- $D_6$ ):  $\delta$  9.03 (s, 1H, H-Im), 7.77 (2H, H-Im), 4.46 (t, 2H,  $-\text{CH}_2\text{CH}_2\text{CH}_2\text{CH}_3$ ), 4.35 (t, 2H,  $-\text{CH}_2\text{CH}_2\text{CH}_2\text{C}\equiv\text{CH}$ ), 2.08 (t, 1H,  $J$  = 2.9 Hz,  $-\text{CH}_2\text{CH}_2\text{CH}_2\text{C}\equiv\text{CH}$ ), 2.33 (m, 2H,  $-\text{CH}_2\text{CH}_2\text{CH}_2\text{C}\equiv\text{CH}$ ), 2.26 (m, 2H,  $-\text{CH}_2\text{CH}_2\text{CH}_2\text{C}\equiv\text{CH}$ ), 1.93 (m, 2H,  $-\text{CH}_2\text{CH}_2\text{CH}_2\text{CH}_3$ ), 1.38 (m, 2H,  $-\text{CH}_2\text{CH}_2\text{CH}_2\text{CH}_3$ ), 0.94 (t, 3H,  $-\text{CH}_2\text{CH}_2\text{CH}_2\text{CH}_3$ ).  $^{13}\text{C}$  NMR (75 MHz, acetone- $D_6$ ):  $\delta$  137.5 (2-CH Im), 123.62 (4-CH Im), 123.60 (5-CH Im), 82.7 ( $-\text{CH}_2\text{CH}_2\text{CH}_2\text{C}\equiv\text{CH}$ ), 71.4 ( $-\text{CH}_2\text{CH}_2\text{CH}_2\text{C}\equiv\text{CH}$ ), 50.3 ( $-\text{CH}_2\text{CH}_2\text{CH}_2\text{C}\equiv\text{CH}$ ), 49.4 ( $-\text{CH}_2\text{CH}_2\text{CH}_2\text{CH}_3$ ), 32.6 ( $-\text{CH}_2\text{CH}_2\text{CH}_2\text{CH}_3$ ), 29.3 ( $-\text{CH}_2\text{CH}_2\text{CH}_2\text{C}\equiv\text{CH}$ ), 19.9 ( $-\text{CH}_2\text{CH}_2\text{CH}_2\text{C}\equiv\text{CH}$ ), 15.7 ( $-\text{CH}_2\text{CH}_2\text{CH}_2\text{CH}_3$ ), 13.6 ( $-\text{CH}_2\text{CH}_2\text{CH}_2\text{CH}_3$ ). ESI MS ( $\text{M-PF}_6$ ) $^+$   $m/z$  (%) calcd for  $[\text{C}_{12}\text{H}_{19}\text{N}_2]^+$ : 191.29, found: 191.4

**1-butyl-3-[1-(6<sup>I-VII</sup>-deoxy-6<sup>II-VII</sup>,2<sup>I-VII</sup>,3<sup>I-VII</sup>-O-permethyl- $\beta$ -cyclodextrin-6<sup>I</sup>-yl)triazol-4-ylmethyl]imidazolium bromide (8).** Yellow powder;  $R_f$  ( $\text{CHCl}_3/\text{CH}_3\text{OH}$  8:2) = 0.4; mp 107 °C; FTIR (KBr)  $\nu/\text{cm}^{-1}$  = 2930, 2836, 2100, 1749.6, 1650, 1455, 1369.6, 1165, 1109, 968.4, 951, 856.5, 835.3, 754.3, 706.  $^1\text{H}$  NMR (300 MHz,  $\text{CD}_3\text{OD}$ ):  $\delta$  9.16 (br s, 1H, H-Im), 8.20 (br s, 1H, H-Tz), 7.70 (br, 2H, H-Im), 5.59 (br s, 2H, Tz- $\text{CH}_2$ -Im), 5.4-5.1 (overlapped signals, 7H, 1-H), 5.1-4.85 (m, 2H, 6- $\text{CH}_2$ -Tz), 4.25 (t, 2H,  $-\text{CH}_2\text{CH}_2\text{CH}_2\text{CH}_3$ ), 4.1 (br m, 1H, 5-H near 6- $\text{CH}_2$ -Tz), 4.0-3.7 (overlapped signals, 14H, 5,6-H), 3.7-3.45 (overlapped signals, 57H, 3,4,6-H, 2,3-OCH<sub>3</sub>), 3.45-3.25 (overlapped signals, 18H, 6-OCH<sub>3</sub>), 3.25-3.0 (overlapped signals, 10H, 2,6-H), 1.9 (m, 2H,  $-\text{CH}_2\text{CH}_2\text{CH}_2\text{CH}_3$ ), 1.4 (m, 2H,  $-\text{CH}_2\text{CH}_2\text{CH}_2\text{CH}_3$ ), 1.0 (t, 3H,  $-\text{CH}_2\text{CH}_2\text{CH}_2\text{CH}_3$ ).  $^{13}\text{C}$  NMR (75 MHz,  $\text{CD}_3\text{OD}$ ):  $\delta$  137.5 (CH Im), 128 (CH Tz), 124.1 (CH Im), 123.8 (CH Im), 99.5-98.9 (1-CH), 83.5-82.1 (2,4-CH), 81-78.9 (3-CH), 72.7-72.5 (6- $\text{CH}_2$ ), 72.5-71.3 (5-CH), 62-58.4 (-OMe), 52.2 (6- $\text{CH}_2$ -Tz), 50.6 ( $-\text{CH}_2\text{CH}_2\text{CH}_2\text{CH}_3$ ), 44.9 (Tz- $\text{CH}_2$ -Im), 32.8 ( $-\text{CH}_2\text{CH}_2\text{CH}_2\text{CH}_3$ ), 20.2 ( $-\text{CH}_2\text{CH}_2\text{CH}_2\text{CH}_3$ ), 13.5 ( $-\text{CH}_2\text{CH}_2\text{CH}_2\text{CH}_3$ ). ESI MS ( $\text{M+H}$ ) $^+$   $m/z$  (%) calcd for  $[\text{C}_{72}\text{H}_{124}\text{BrN}_5\text{O}_{34}]$ : 1683.67, found: 1683.84 (5%); ( $\text{M-Br}$ ) $^+$  calcd for  $[\text{C}_{72}\text{H}_{124}\text{N}_5\text{O}_{34}]^+$ : 1603.77, found: 1603.89 (100%).

**1-butyl-3-[3-(1-(6<sup>I-VII</sup>-deoxy-6<sup>II-VII</sup>,2<sup>I-VII</sup>,3<sup>I-VII</sup>-O-permethyl- $\beta$ -cyclodextrin-6<sup>I</sup>-yl)triazol-4-yl)propyl]imidazolium chloride (9).** Yellow powder;  $R_f$  ( $\text{CHCl}_3/\text{CH}_3\text{OH}$  8:2) = 0.35; mp 84 °C; FTIR (KBr)  $\nu/\text{cm}^{-1}$  = 2930, 2835.7, 1645, 1564, 1458, 1369, 1161, 1088, 1037, 968, 912, 856, 754, 704.  $^1\text{H}$  NMR (300 MHz,  $\text{CD}_3\text{OD}$ ):  $\delta$  9.1 (br s, 1H, H-Im), 7.82 (br s, 1H, H-Tz), 7.71 (d, 1H, H-Im), 7.69 (d, 1H, H-Im), 5.42-5.11 (7H, 1-H), 5.00-4.85 (m, 2H, 6- $\text{CH}_2$ -Tz), 4.32 (t, 2H, Im- $\text{CH}_2\text{CH}_2\text{CH}_2$ -Tz), 4.24 (t, 2H,  $-\text{CH}_2\text{CH}_2\text{CH}_2\text{CH}_3$ ), 4.08 (br m, 1H, 5-H near 6- $\text{CH}_2$ -Tz), 4.0-3.7 (overlapped signals, 13H, 5,6-H), 3.7-3.40 (overlapped signals, 59H, 3,4,6-H, 2,3-OCH<sub>3</sub>), 3.40-3.25 (18H, 6-OCH<sub>3</sub>), 3.25-3.0 (overlapped signals, 9H, 2,6-H), 2.78 (t, 2H, Im- $\text{CH}_2\text{CH}_2\text{CH}_2$ -Tz), 2.29 (t, 2H, Im- $\text{CH}_2\text{CH}_2\text{CH}_2$ -Tz), 1.89 (m, 2H,  $-\text{CH}_2\text{CH}_2\text{CH}_2\text{CH}_3$ ), 1.38 (m, 2H,  $-\text{CH}_2\text{CH}_2\text{CH}_2\text{CH}_3$ ), 1.0 (t, 3H,  $-\text{CH}_2\text{CH}_2\text{CH}_2\text{CH}_3$ ).  $^{13}\text{C}$  NMR (75 MHz,  $\text{CD}_3\text{OD}$ ):  $\delta$  137.5 (CH Im), 126 (CH Tz), 123.9 (CH Im), 123.8 (CH Im), 99.65-99.17 (1-CH), 83.7-82.5 (2,4-CH), 81.2-79.3 (3-CH), 72.9-72.5 (6- $\text{CH}_2$ ), 72.5-71.8 (5-CH), 62.1-58.6 (-OMe), 52.2 (6- $\text{CH}_2$ -Tz), 50.7 (Im- $\text{CH}_2\text{CH}_2\text{CH}_2$ -Tz), 50.1 ( $-\text{CH}_2\text{CH}_2\text{CH}_2\text{CH}_3$ ), 33.05 ( $-\text{CH}_2\text{CH}_2\text{CH}_2\text{CH}_3$ ), 30.8 (Im- $\text{CH}_2\text{CH}_2\text{CH}_2$ -Tz), 22.9 (Im- $\text{CH}_2\text{CH}_2\text{CH}_2$ -Tz), 20.5 ( $-\text{CH}_2\text{CH}_2\text{CH}_2\text{CH}_3$ ), 13.8 ( $-\text{CH}_2\text{CH}_2\text{CH}_2\text{CH}_3$ ). ESI MS ( $\text{M-Cl}$ ) $^+$   $m/z$  (%) calcd for  $[\text{C}_{74}\text{H}_{128}\text{N}_5\text{O}_{34}]^+$ : 1631.82, found: 1632.46 (71%); ( $\text{M+Na-Cl}$ ) $^{2+}$  calcd for  $[\text{C}_{74}\text{H}_{128}\text{N}_5\text{NaO}_{34}]^{2+}$ : 827.40, found: 827.66 (100%).

**1-butyl-3-[1-(6<sup>1</sup>-deoxy-6<sup>II-VII</sup>,2<sup>I-VII</sup>,3<sup>I-VII</sup>-O-permethyl-β-cyclodextrin-6<sup>1</sup>-yl)triazol-4-ylmethyl]imidazolium hexafluorophosphate (10).** Yellow powder;  $R_f$  (CHCl<sub>3</sub>/CH<sub>3</sub>OH 95:5) = 0.23; mp 97 °C; FTIR (KBr)  $\nu/\text{cm}^{-1}$  = 2930, 2835.7, 1645, 1564, 1458, 1369, 1161, 1088, 1037, 968, 912, 856, 754, 704. <sup>1</sup>H NMR (300 MHz, CD<sub>3</sub>OD):  $\delta$  9.01 (br s, 1H, H-Im), 8.19 (br s, 1H, H-Tz), 7.66 (br, 2H, H-Im), 5.57 (br s, 2H, Tz-CH<sub>2</sub>-Im), 5.40-5.10 (overlapped signals, 7H, 1-H), 5.02-4.93 (m, 2H, 6a,b -CH<sub>2</sub>-Tz), 4.24 (t, 2H, -CH<sub>2</sub>CH<sub>2</sub>CH<sub>2</sub>CH<sub>3</sub>), 4.10 (br m, 1H, 5-H near 6-CH<sub>2</sub>-Tz), 4.0-3.7 (overlapped signals, 13H, 5,6-H), 3.7-3.45 (overlapped signals, 60H, 3,4,6-H, 2,3-OCH<sub>3</sub>), 3.45-3.25 (overlapped signals, 18H, 6-OCH<sub>3</sub>), 3.25-3.0 (overlapped signals, 9H, 2,6-H), 1.89 (m, 2H, -CH<sub>2</sub>CH<sub>2</sub>CH<sub>2</sub>CH<sub>3</sub>), 1.37 (m, 2H, -CH<sub>2</sub>CH<sub>2</sub>CH<sub>2</sub>CH<sub>3</sub>), 0.99 (t, 3H, -CH<sub>2</sub>CH<sub>2</sub>CH<sub>2</sub>CH<sub>3</sub>). <sup>13</sup>C NMR (75 MHz, CD<sub>3</sub>OD):  $\delta$  138.3, 137.3 (CH Im), 128.1 (CH Tz), 124.0, 123.7 (CH Im), 99.7-99.1 (1-CH), 83.5-82.4 (2,4-CH), 81.0-79.7 (3-CH), 72.6-72.2 (6-CH<sub>2</sub>), 72.2-72.0 (5-CH), 71.5 (5-CH near 6-CH<sub>2</sub>-Tz), 62.1-58.6 (-OMe), 52.4 (6-CH<sub>2</sub>-Tz), 50.8 (-CH<sub>2</sub>CH<sub>2</sub>CH<sub>2</sub>CH<sub>3</sub>), 45.0 (Tz-CH<sub>2</sub>-Im), 33.0 (-CH<sub>2</sub>CH<sub>2</sub>CH<sub>2</sub>CH<sub>3</sub>), 20.4 (-CH<sub>2</sub>CH<sub>2</sub>CH<sub>2</sub>CH<sub>3</sub>), 13.7 (-CH<sub>2</sub>CH<sub>2</sub>CH<sub>2</sub>CH<sub>3</sub>). ESI MS (M-PF<sub>6</sub>)<sup>+</sup>  $m/z$  (%) calcd for [C<sub>72</sub>H<sub>124</sub>N<sub>5</sub>O<sub>34</sub>]<sup>+</sup>: 1603.77, found: 1603.97.

**1-butyl-3-[3-(1-(6<sup>1</sup>-deoxy-6<sup>II-VII</sup>,2<sup>I-VII</sup>,3<sup>I-VII</sup>-O-permethyl-β-cyclodextrin-6<sup>1</sup>-yl)triazol-4-yl)propyl]imidazolium hexafluorophosphate (11).** Yellow powder;  $R_f$  (CHCl<sub>3</sub>/CH<sub>3</sub>OH 8:2) = 0.63; mp 95 °C; FTIR (KBr)  $\nu/\text{cm}^{-1}$  = 2934, 2837, 1643, 1460, 1369, 1196, 1163, 1109, 1036, 970, 845, 706. <sup>1</sup>H NMR (300 MHz, CD<sub>3</sub>OD):  $\delta$  8.96 (br s, 1H, H-Im), 7.82 (br s, 1H, H-Tz), 7.67 (m, 2H, H-Im), 5.41, 5.30-5.10 (7H, 1-H), 5.00, 4.80 (m, 2H, 6-CH<sub>2</sub>-Tz), 4.29 (t, 2H, Im-CH<sub>2</sub>CH<sub>2</sub>CH<sub>2</sub>-Tz), 4.22 (t, 2H, -CH<sub>2</sub>CH<sub>2</sub>CH<sub>2</sub>CH<sub>3</sub>), 4.09 (br m, 1H, 5-H near 6-CH<sub>2</sub>-Tz), 4.05-3.7 (overlapped signals, 12H, 5,6-H), 3.7-3.45 (overlapped signals, 58H, 3,4,6-H, 2,3-OCH<sub>3</sub>), 3.40-3.25 (overlapped signals, 20H, 6-H, 6-OCH<sub>3</sub>), 3.25-3.0 (overlapped signals, 9H, 2,6-H), 2.78 (t, 2H, Im-CH<sub>2</sub>CH<sub>2</sub>CH<sub>2</sub>-Tz), 2.29 (t, 2H, Im-CH<sub>2</sub>CH<sub>2</sub>CH<sub>2</sub>-Tz), 1.89 (m, 2H, -CH<sub>2</sub>CH<sub>2</sub>CH<sub>2</sub>CH<sub>3</sub>), 1.38 (m, 2H, -CH<sub>2</sub>CH<sub>2</sub>CH<sub>2</sub>CH<sub>3</sub>), 0.99 (t, 3H, -CH<sub>2</sub>CH<sub>2</sub>CH<sub>2</sub>CH<sub>3</sub>). <sup>13</sup>C NMR (75 MHz, CD<sub>3</sub>OD):  $\delta$  137.2 (CH Im), 126 (CH Tz), 123.83 (CH Im), 123.78 (CH Im), 99.66-99.23 (1-CH), 83.6-82.5 (2,4-CH), 81.1-79.7 (3-CH), 72.8-72.4 (6-CH<sub>2</sub>), 72.5-71.7 (5-CH), 62.1-58.6 (-OMe), 52.2 (6-CH<sub>2</sub>-Tz), 50.7 (-CH<sub>2</sub>CH<sub>2</sub>CH<sub>2</sub>CH<sub>3</sub>), 50.1 (Im-CH<sub>2</sub>CH<sub>2</sub>CH<sub>2</sub>-Tz), 33.0 (-CH<sub>2</sub>CH<sub>2</sub>CH<sub>2</sub>CH<sub>3</sub>), 30.8 (Im-CH<sub>2</sub>CH<sub>2</sub>CH<sub>2</sub>-Tz), 23.0 (Im-CH<sub>2</sub>CH<sub>2</sub>CH<sub>2</sub>-Tz), 20.5 (-CH<sub>2</sub>CH<sub>2</sub>CH<sub>2</sub>CH<sub>3</sub>), 13.8 (-CH<sub>2</sub>CH<sub>2</sub>CH<sub>2</sub>CH<sub>3</sub>). ESI MS (M-PF<sub>6</sub>)<sup>+</sup>  $m/z$  (%) calcd for [C<sub>74</sub>H<sub>128</sub>N<sub>5</sub>O<sub>34</sub>]<sup>+</sup>: 1631.82, found: 1632.38.

**1-butyl-3-[1-(6<sup>1</sup>-deoxy-β-cyclodextrin-6<sup>1</sup>-yl)triazol-4-yl methyl]imidazolium bromide (3).** White powder;  $R_f$  (*i*-Prop-OH/H<sub>2</sub>O/EtOAc/NH<sub>3</sub> 5:3:1:1) = 0.33; mp dec. 210 °C; FTIR (KBr)  $\nu/\text{cm}^{-1}$  = 3350, 2921, 2851, 1645, 1412, 1369, 1238, 1157, 1080, 1032, 1005, 947, 845, 754. <sup>1</sup>H NMR (300 MHz, D<sub>2</sub>O):  $\delta$  8.98 (br s, 1H, H-Im), 8.21 (br s, 1H, H-Tz), 7.58 (d, 1H, H-Im), 7.55 (d, 1H, H-Im), 5.57 (br s, 2H, Tz-CH<sub>2</sub>-Im), 5.2-4.9 (overlapped signals, 7H, 1-H overlaps with m, 1H, 6a-CH<sub>2</sub>-Tz), 4.65 (m, 1H, 6b-CH<sub>2</sub>-Tz), 4.22 (t, 2H, 1-H overlaps with br m, 1H, 5-H near 6-CH<sub>2</sub>-Tz), 4.0-3.7 (overlapped signals, 23H, 3,5,6-H), 3.7-3.40 (overlapped signals, 14H, 2,4-H), 2.80 (dd, 2H, 6-H), 1.86 (m, 2H, -CH<sub>2</sub>CH<sub>2</sub>CH<sub>2</sub>CH<sub>3</sub>), 1.31 (m, 2H, -CH<sub>2</sub>CH<sub>2</sub>CH<sub>2</sub>CH<sub>3</sub>), 0.92 (t, 3H, -CH<sub>2</sub>CH<sub>2</sub>CH<sub>2</sub>CH<sub>3</sub>). <sup>13</sup>C NMR (75 MHz, D<sub>2</sub>O):  $\delta$  140.9 (CH Im), 127.3 (CH Tz), 123.2 (CH Im), 122.8 (CH Im), 102.4-101.8 (1-CH), 83.5-81.2 (4-CH), 73.5-71.8 (2,3,5-CH), 70.8 (5-CH near 6-CH<sub>2</sub>-Tz), 60.7-59.5 (6-CH<sub>2</sub>), 51.8 (6-CH<sub>2</sub>-Tz), 49.9 (-CH<sub>2</sub>CH<sub>2</sub>CH<sub>2</sub>CH<sub>3</sub>), 44.0 (Tz-CH<sub>2</sub>-Im), 31.6 (-CH<sub>2</sub>CH<sub>2</sub>CH<sub>2</sub>CH<sub>3</sub>), 19.2 (-CH<sub>2</sub>CH<sub>2</sub>CH<sub>2</sub>CH<sub>3</sub>), 13.05 (-CH<sub>2</sub>CH<sub>2</sub>CH<sub>2</sub>CH<sub>3</sub>). ESI MS (M-Br)<sup>+</sup>  $m/z$  (%) calcd for [C<sub>52</sub>H<sub>84</sub>N<sub>5</sub>O<sub>34</sub>]<sup>+</sup>: 1323.24, found: 1323.12 (35%); (M+Na-Br)<sup>2+</sup> calcd for [C<sub>52</sub>H<sub>84</sub>N<sub>5</sub>NaO<sub>34</sub>]<sup>2+</sup>: 673.11, found: 672.92 (100%).

**1-butyl-3-[3-(1-(6<sup>1</sup>-deoxy-β-cyclodextrin-6<sup>1</sup>-yl)triazol-4-yl) propyl]imidazolium chloride (4).** Pale-yellow powder;  $R_f$  (*i*-Prop-OH/H<sub>2</sub>O/EtOAc/NH<sub>3</sub> 5:3:1:1) = 0.37; mp > 350 °C; FTIR (KBr)  $\nu/\text{cm}^{-1}$  = 3350, 2919, 2851, 1648, 1541, 1457, 1375, 1159, 1080, 1030, 1001, 947, 754. <sup>1</sup>H NMR (300 MHz, D<sub>2</sub>O):  $\delta$  8.96 (br s, 1H, H-Im), 7.86 (br s, 1H, H-Tz), 7.49 (d, 1H, H-Im), 7.46 (d, 1H, H-Im), 5.2-4.9 (overlapped signals, 7H, 1-H overlaps with m, 1H, 6a-CH<sub>2</sub>-Tz), 4.60 (m, 1H, 6b-CH<sub>2</sub>-Tz), 4.29 (t, 2H, Im-CH<sub>2</sub>CH<sub>2</sub>CH<sub>2</sub>-Tz), 4.20 (t, 2H, 1-H overlaps with br m, 1H, 5-H near 6-CH<sub>2</sub>-Tz), 4.0-3.7 (overlapped signals, 23H, 3,5,6-H), 3.7-3.40 (overlapped signals, 14H, 2,4-H), 3.12-2.80 (dd, 2H, 6-H), 2.79 (t, 2H, Im-CH<sub>2</sub>CH<sub>2</sub>CH<sub>2</sub>-Tz), 2.30 (t, 2H, Im-CH<sub>2</sub>CH<sub>2</sub>CH<sub>2</sub>-Tz), 1.84 (m, 2H, -CH<sub>2</sub>CH<sub>2</sub>CH<sub>2</sub>CH<sub>3</sub>), 1.33 (m, 2H, -CH<sub>2</sub>CH<sub>2</sub>CH<sub>2</sub>CH<sub>3</sub>), 0.93 (t, 3H, -CH<sub>2</sub>CH<sub>2</sub>CH<sub>2</sub>CH<sub>3</sub>). <sup>13</sup>C NMR (75 MHz, D<sub>2</sub>O):  $\delta$  140.2 (CH Im), 126 (CH Tz), 122.7 (CH Im), 122.6 (CH Im), 102.5-101.8 (1-CH), 83.6-81.2 (4-CH), 73.5-71.8 (2,3,5-CH), 71.0 (5-CH near 6-CH<sub>2</sub>-Tz), 60.7-59.3 (6-CH<sub>2</sub>), 51.5 (6-CH<sub>2</sub>-Tz), 49.6 (-CH<sub>2</sub>CH<sub>2</sub>CH<sub>2</sub>CH<sub>3</sub>), 49.3 (Im-CH<sub>2</sub>CH<sub>2</sub>CH<sub>2</sub>-Tz), 31.6 (-CH<sub>2</sub>CH<sub>2</sub>CH<sub>2</sub>CH<sub>3</sub>), 29.9 (Im-CH<sub>2</sub>CH<sub>2</sub>CH<sub>2</sub>-Tz), 21.9 (Im-CH<sub>2</sub>CH<sub>2</sub>CH<sub>2</sub>-Tz), 19.2 (-CH<sub>2</sub>CH<sub>2</sub>CH<sub>2</sub>CH<sub>3</sub>), 13.0 (-CH<sub>2</sub>CH<sub>2</sub>CH<sub>2</sub>CH<sub>3</sub>). ESI MS (M-Cl)<sup>+</sup>  $m/z$  (%) calcd for [C<sub>54</sub>H<sub>88</sub>N<sub>5</sub>O<sub>34</sub>]<sup>+</sup>: 1351.29, found: 1351.57.

**1-butyl-3-[1-(6<sup>1</sup>-deoxy-β-cyclodextrin-6<sup>1</sup>-yl)triazol-4-yl methyl]imidazolium hexafluorophosphate (5).** Pale-yellow powder;  $R_f$  (*i*-Prop-OH/H<sub>2</sub>O/EtOAc/NH<sub>3</sub> 5:3:1:1) = 0.38; mp dec. 212 °C; FTIR (KBr)  $\nu/\text{cm}^{-1}$  = 3360, 2932, 1650, 1560, 1458, 1340, 1161, 1080, 1028, 947, 843, 754. <sup>1</sup>H NMR (300 MHz, CD<sub>3</sub>OD):  $\delta$  9.01 (br s, 1H, H-Im), 8.20 (br s, 1H, H-Tz), 7.67 (br, 1H, H-Im), 7.65 (br, 1H, H-Im), 5.56 (br s, 2H, Tz-CH<sub>2</sub>-Im), 5.2-4.8 (overlapped signals, 7H, 1-H overlaps with m, 1H, 6a-CH<sub>2</sub>-Tz), 4.7 (m, 1H, 6b-CH<sub>2</sub>-Tz), 4.24 (t, 2H, -CH<sub>2</sub>CH<sub>2</sub>CH<sub>2</sub>CH<sub>3</sub>), 4.14 (br m, 1H, 5-H near 6-CH<sub>2</sub>-Tz), 4.0-3.7 (overlapped signals, 23H, 3,5,6-H), 3.7-3.30 (overlapped signals, 14H, 2,4-H), 3.15-2.95 (dd, 2H, 6-H), 1.89 (m, 2H, -CH<sub>2</sub>CH<sub>2</sub>CH<sub>2</sub>CH<sub>3</sub>), 1.40 (m, 2H, -CH<sub>2</sub>CH<sub>2</sub>CH<sub>2</sub>CH<sub>3</sub>), 0.99 (t, 3H, -CH<sub>2</sub>CH<sub>2</sub>CH<sub>2</sub>CH<sub>3</sub>). <sup>13</sup>C NMR (75 MHz, CD<sub>3</sub>OD):  $\delta$  141.8, 137.5 (CH Im), 127.3 (CH Tz), 123.9 (CH Im), 104.0-103.8 (1-CH), 85.1-82.9 (4-CH), 74.8-73.4 (2,3,5-CH), 72.0 (5-CH near 6-CH<sub>2</sub>-Tz), 62.0-61.8 (6-CH<sub>2</sub>), 52.7 (6-CH<sub>2</sub>-Tz), 50.8 (-CH<sub>2</sub>CH<sub>2</sub>CH<sub>2</sub>CH<sub>3</sub>), 45.2 (Tz-CH<sub>2</sub>-Im), 33.0 (-CH<sub>2</sub>CH<sub>2</sub>CH<sub>2</sub>CH<sub>3</sub>), 20.4 (-CH<sub>2</sub>CH<sub>2</sub>CH<sub>2</sub>CH<sub>3</sub>), 13.8 (-CH<sub>2</sub>CH<sub>2</sub>CH<sub>2</sub>CH<sub>3</sub>). ESI MS (M-PF<sub>6</sub>)<sup>+</sup>  $m/z$  (%) calcd for [C<sub>52</sub>H<sub>84</sub>N<sub>5</sub>O<sub>34</sub>]<sup>+</sup>: 1323.24, found: 1323.72.

**1-butyl-3-[3-(1-(6<sup>1</sup>-deoxy-β-cyclodextrin-6<sup>1</sup>-yl)triazol-4-yl) propyl]imidazolium hexafluorophosphate (6).** Yellow powder;  $R_f$  (*i*-Prop-OH/H<sub>2</sub>O/EtOAc/NH<sub>3</sub> 5:3:1:1) = 0.39; mp dec. 222 °C; FTIR (KBr)  $\nu/\text{cm}^{-1}$  = 3360, 2934, 1684, 1635, 1568, 1458, 1339, 1159, 1080, 1028, 947, 843, 754. <sup>1</sup>H NMR (300 MHz, CD<sub>3</sub>OD):  $\delta$  8.98 (br s, 1H, H-Im), 7.86 (br s, 1H, H-Tz),

7.65 (br, 2H, H-Im), 5.1-4.8 (m, 7H, 1-H overlaps with m, 1H, 6a-CH<sub>2</sub>-Tz), 4.60 (m, 1H, 6b-CH<sub>2</sub>-Tz), 4.31 (t, 2H, Im-CH<sub>2</sub>CH<sub>2</sub>CH<sub>2</sub>-Tz), 4.24 (t, 2H, -CH<sub>2</sub>CH<sub>2</sub>CH<sub>2</sub>CH<sub>3</sub>), 4.12 (br m, 1H, 5-H near 6-CH<sub>2</sub>-Tz), 4.0-3.7 (overlapped signals, 23H, 3,5,6-H), 3.7-3.40 (overlapped signals, 14H, 2,4-H), 3.3-3.05 (dd, 2H, 6-H), 2.78 (t, 2H, Im-CH<sub>2</sub>CH<sub>2</sub>CH<sub>2</sub>-Tz), 2.30 (t, 2H, Im-CH<sub>2</sub>CH<sub>2</sub>CH<sub>2</sub>-Tz), 1.89 (m, 2H, -CH<sub>2</sub>CH<sub>2</sub>CH<sub>2</sub>CH<sub>3</sub>), 1.37 (m, 2H, -CH<sub>2</sub>CH<sub>2</sub>CH<sub>2</sub>CH<sub>3</sub>), 0.99 (t, 3H, -CH<sub>2</sub>CH<sub>2</sub>CH<sub>2</sub>CH<sub>3</sub>). <sup>13</sup>C NMR (75 MHz, CD<sub>3</sub>OD): δ 147.2, 137 (CH Im), 125.4 (CH Tz), 123.8 (CH Im), 104-103 (1-CH), 85-82 (4-CH), 75-73 (2,3,5-CH), 72.0 (5-CH near 6-CH<sub>2</sub>-Tz), 62-60 (6-CH<sub>2</sub>), 52.4 (6-CH<sub>2</sub>-Tz), 50.6 (-CH<sub>2</sub>CH<sub>2</sub>CH<sub>2</sub>CH<sub>3</sub>), 50.2 (Im-CH<sub>2</sub>CH<sub>2</sub>CH<sub>2</sub>-Tz), 33.0 (-CH<sub>2</sub>CH<sub>2</sub>CH<sub>2</sub>CH<sub>3</sub>), 30.5 (Im-CH<sub>2</sub>CH<sub>2</sub>CH<sub>2</sub>-Tz), 22.9 (Im-CH<sub>2</sub>CH<sub>2</sub>CH<sub>2</sub>-Tz), 20.5 (-CH<sub>2</sub>CH<sub>2</sub>CH<sub>2</sub>CH<sub>3</sub>), 13.8 (-CH<sub>2</sub>CH<sub>2</sub>CH<sub>2</sub>CH<sub>3</sub>). ESI MS (M-PF<sub>6</sub>)<sup>+</sup> *m/z* (%) calcd for [C<sub>54</sub>H<sub>88</sub>N<sub>5</sub>O<sub>34</sub>]<sup>+</sup>: 1351.29, found: 1351.55.

### NMR Spectra<sup>1</sup>-azido-6<sup>1</sup>-deoxy- $\beta$ -CD (**2**)

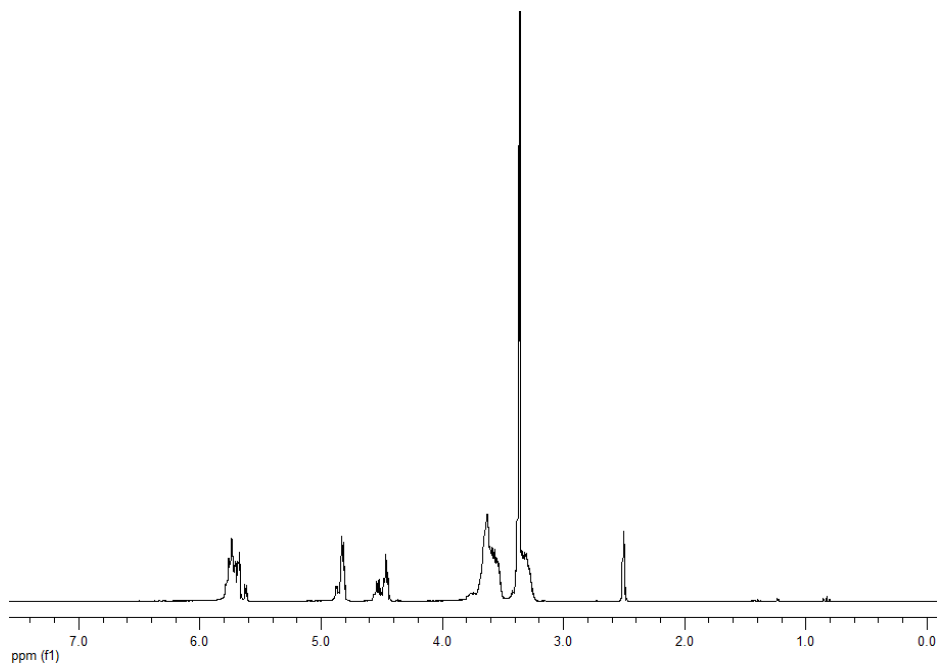

**Fig. 1.** <sup>1</sup>H NMR (300 MHz, DMSO-D<sub>6</sub>) of **2**.

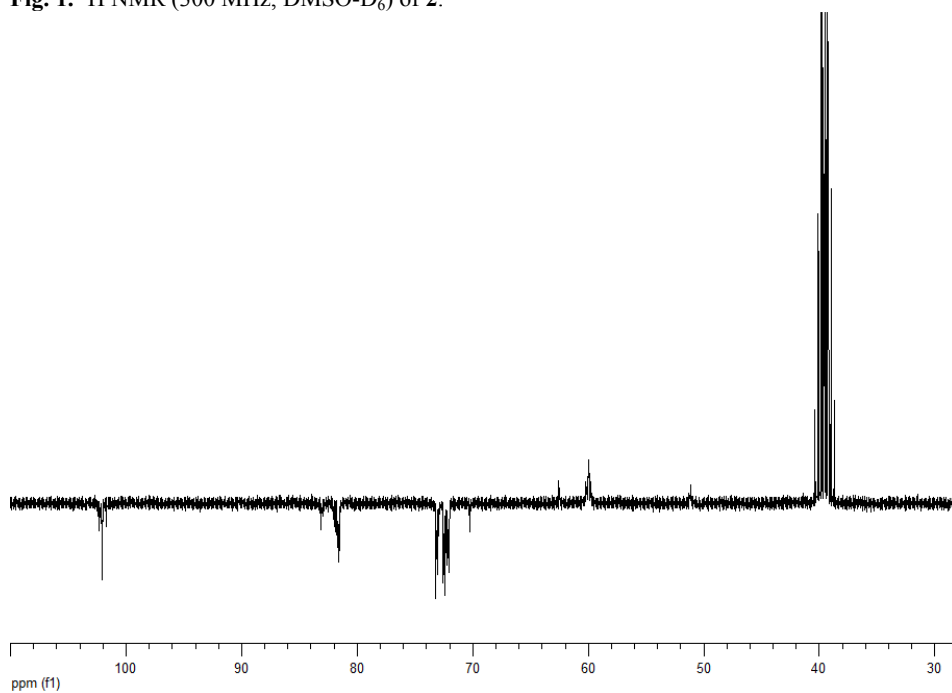

**Fig. 2.** <sup>13</sup>C APT NMR (75 MHz, DMSO-D<sub>6</sub>) of **2**.

**6<sup>I</sup>-azido-6<sup>I</sup>-deoxy-2<sup>I-VII</sup>,3<sup>I-VII</sup>,6<sup>I-VII</sup>-permethyl-β-CD (7)**

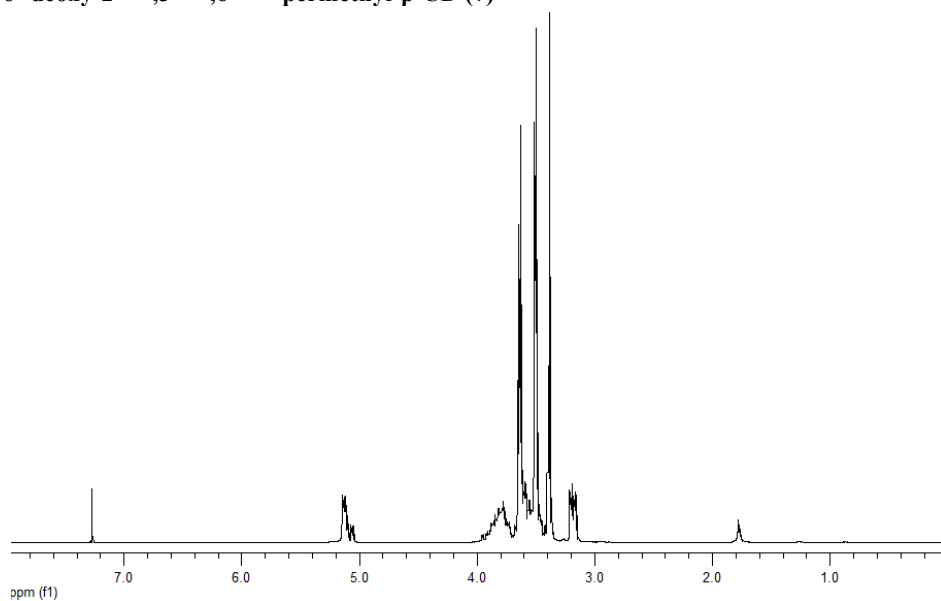

**Fig. 3.** <sup>1</sup>H NMR (300 MHz, CDCl<sub>3</sub>) of 7.

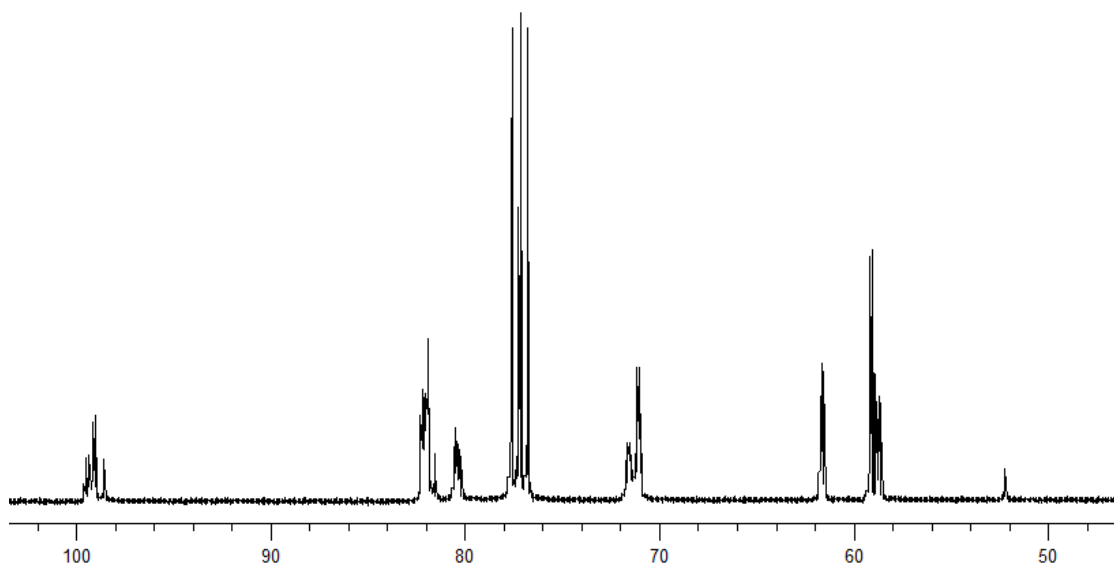

**Fig. 4.** <sup>13</sup>C NMR (75 MHz, CDCl<sub>3</sub>) of 7.

**1-butyl-3-propargylimidazolium bromide.**

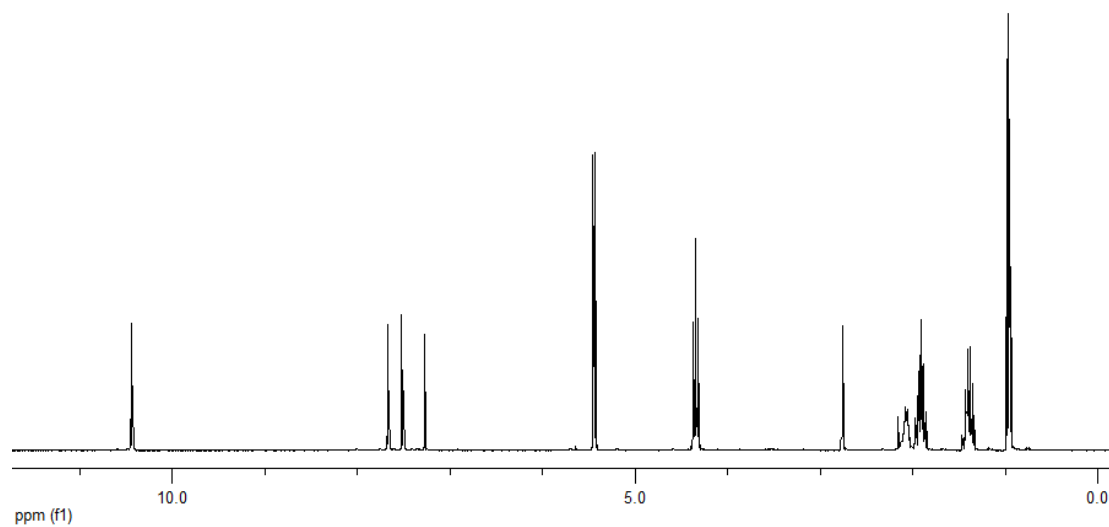

**Fig. 5.**  $^1\text{H}$  NMR (300 MHz,  $\text{CDCl}_3$ ) of BuPrImBr.

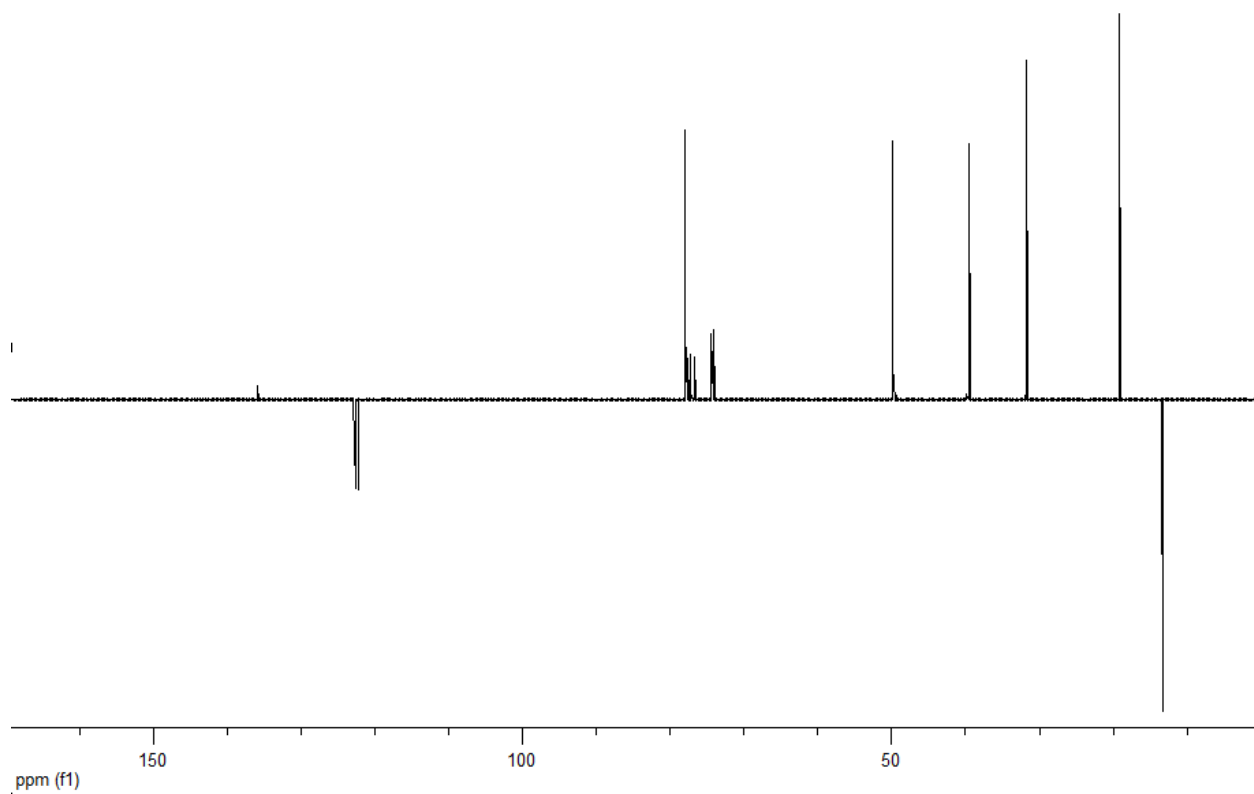

**Fig. 6.**  $^{13}\text{C}$  NMR (75 MHz,  $\text{CDCl}_3$ ) of BuPrImBr.



**1-butyl-3-propargylimidazolium hexafluorophosphate.**

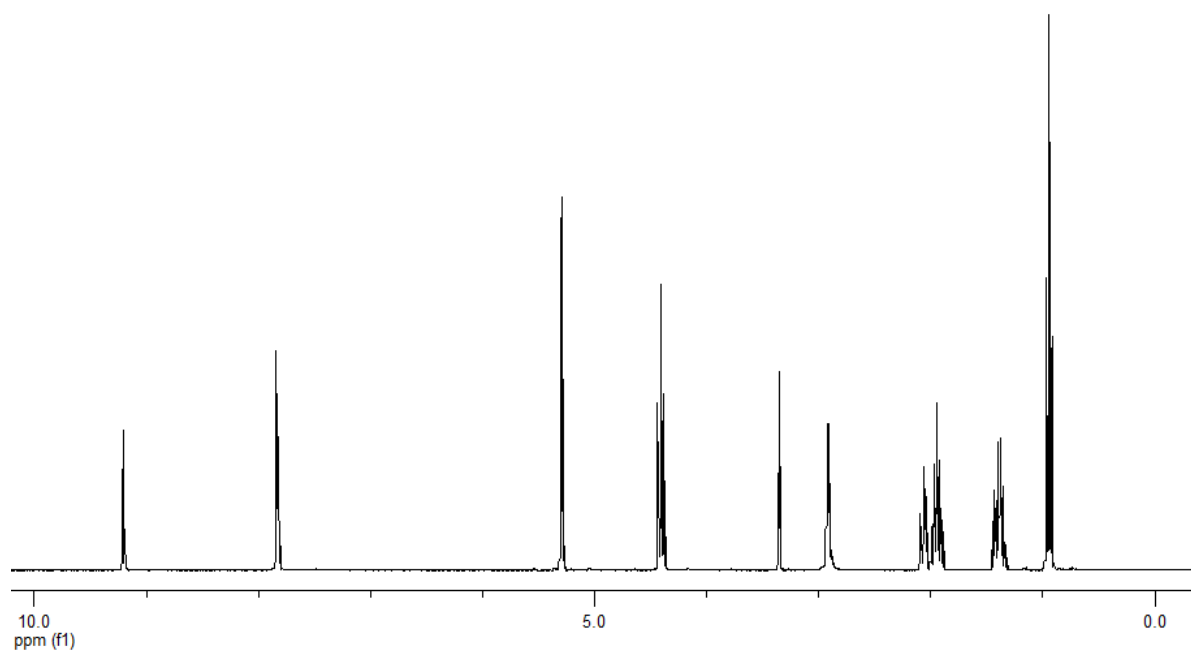

**Fig. 7.** <sup>1</sup>H NMR (300 MHz, acetone-D<sub>6</sub>) of BuPrImPF<sub>6</sub>.

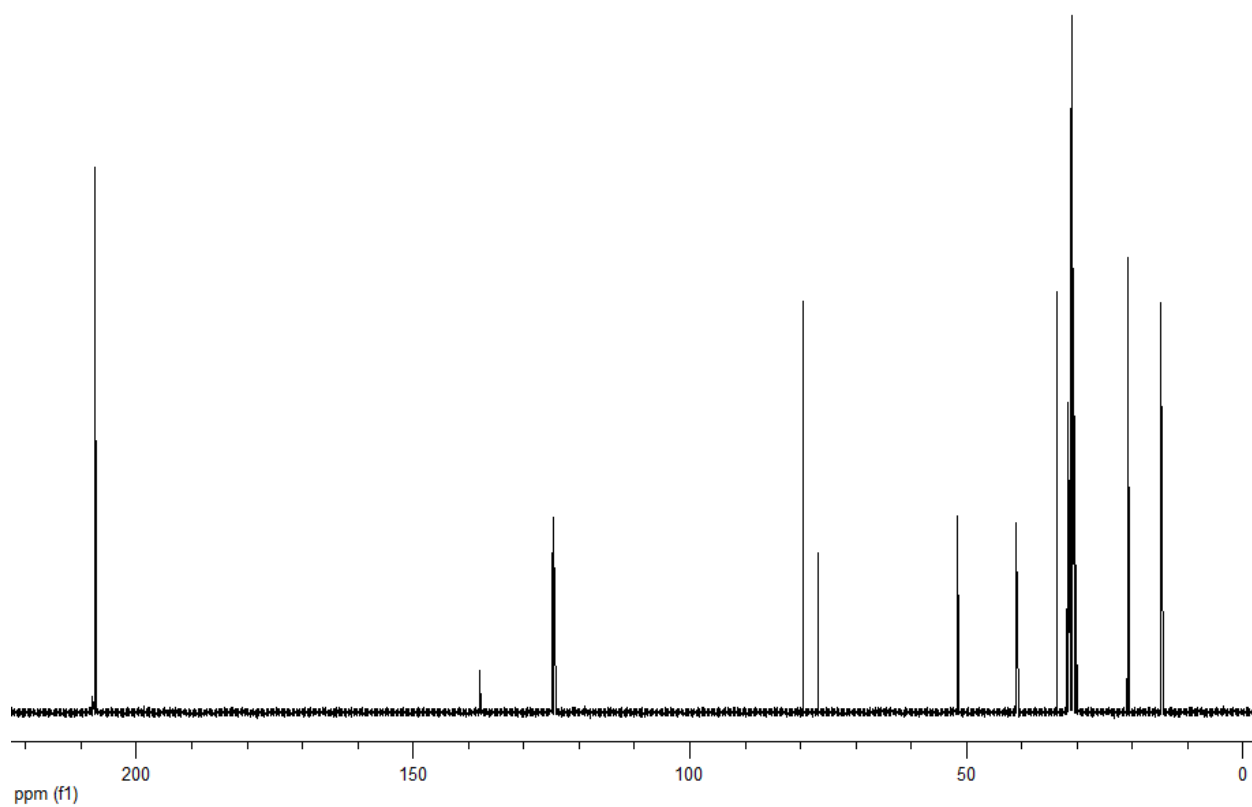

**Fig. 8.** <sup>13</sup>C NMR (75 MHz, acetone-D<sub>6</sub>) of BuPrImPF<sub>6</sub>.

**1-butyl-3-(4-pentynyl)imidazolium chloride.**

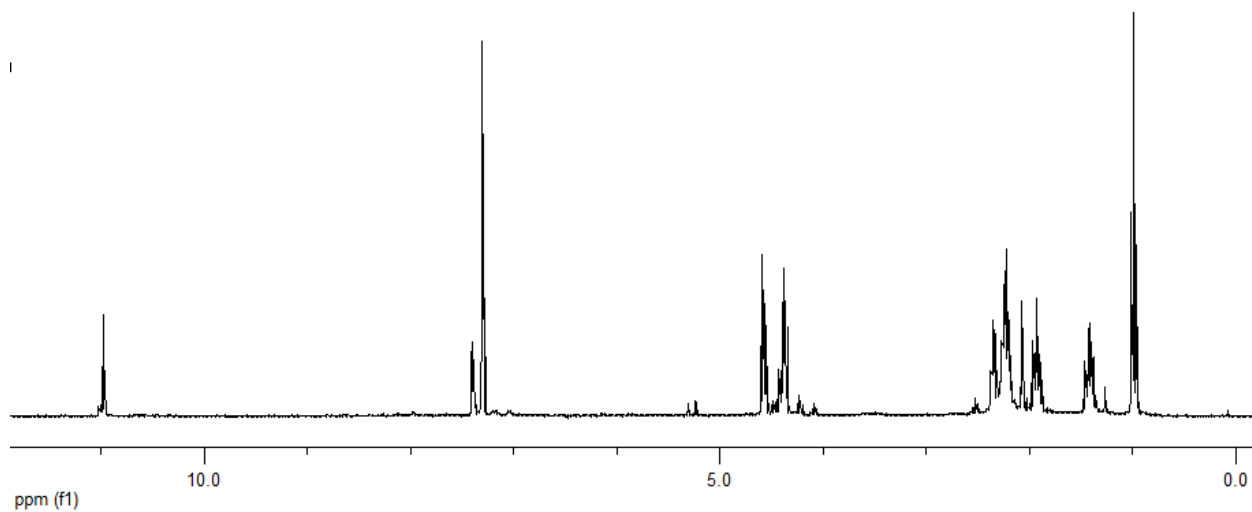

**Fig. 9.** <sup>1</sup>H NMR (300 MHz, CDCl<sub>3</sub>) of BuPeImCl.

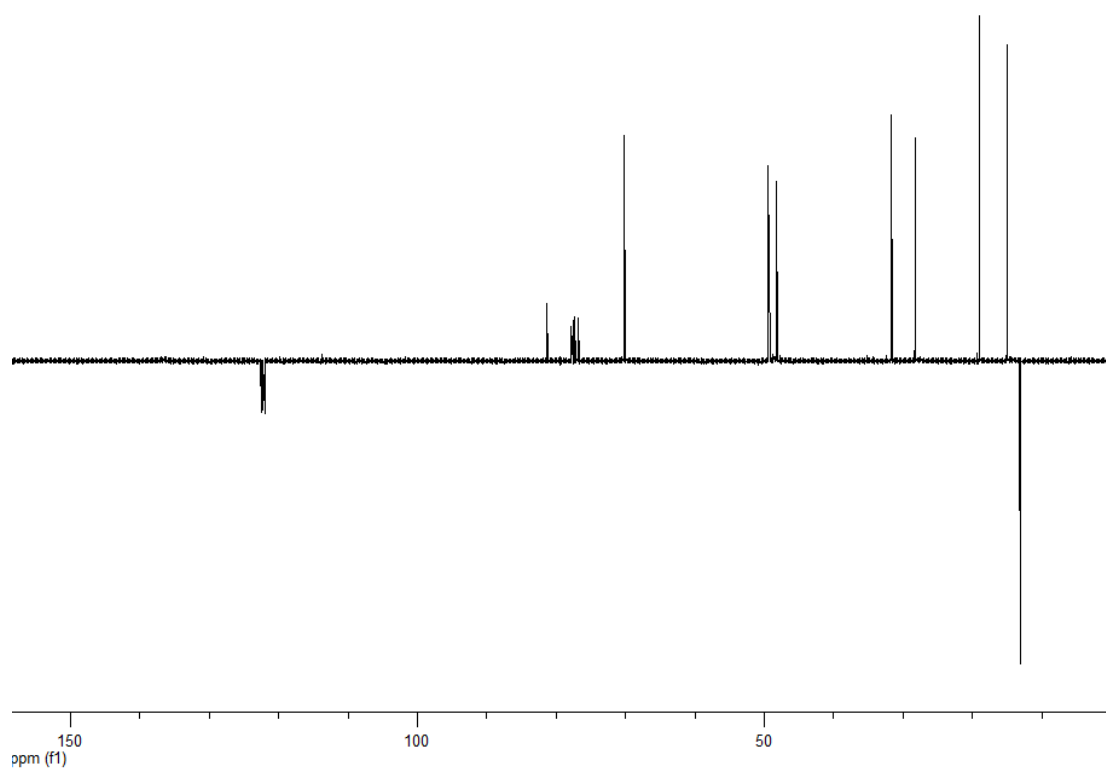

**Fig. 10.** <sup>13</sup>C APT NMR (75 MHz, CDCl<sub>3</sub>) of BuPeImCl.

**1-butyl-3-(4-pentynyl)imidazolium hexafluorophosphate.**

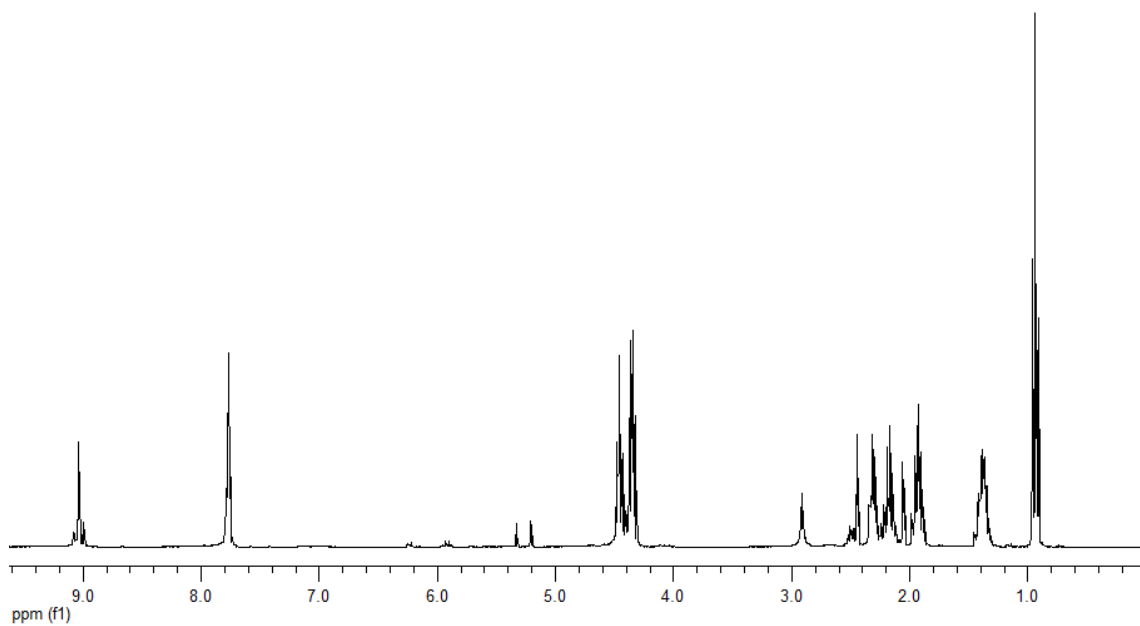

**Fig. 11.**  $^1\text{H}$  NMR (300 MHz, acetone- $\text{D}_6$ ) of BuPeImPF $_6$ .

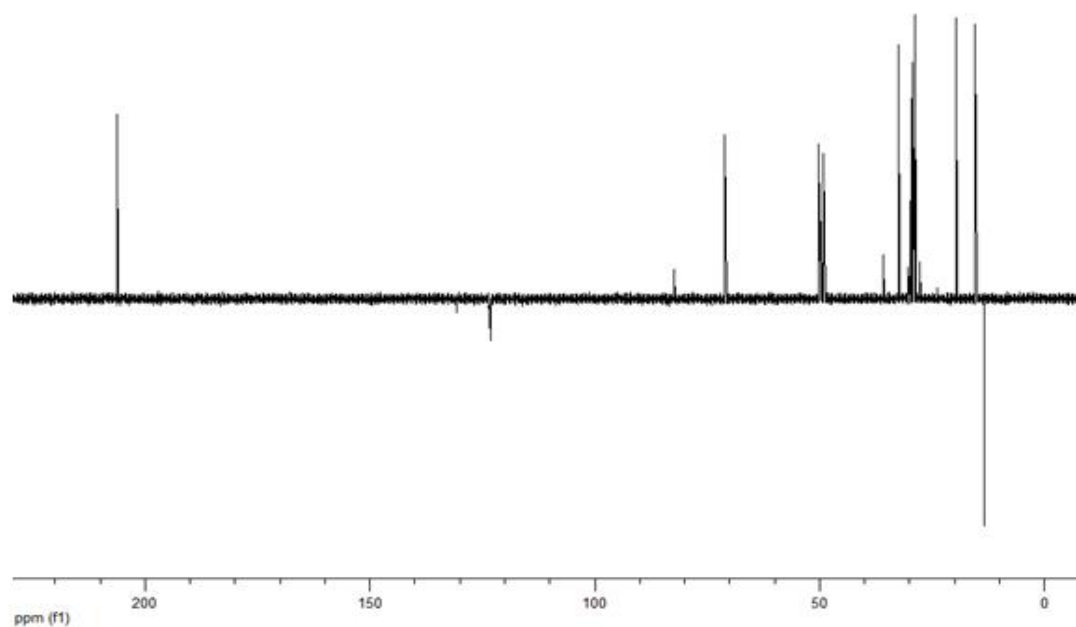

**Fig. 12.**  $^{13}\text{C}$  NMR (75 MHz, acetone- $\text{D}_6$ ) of BuPeImPF $_6$ .

1-butyl-3-[1-(6<sup>1</sup>-deoxy-6<sup>H-VII</sup>,2<sup>1-VII</sup>,3<sup>1-VII</sup>-*O*-permethyl- $\beta$ -cyclodextrin-6<sup>1</sup>-yl)triazol-4-ylmethyl]imidazolium bromide (**8**).

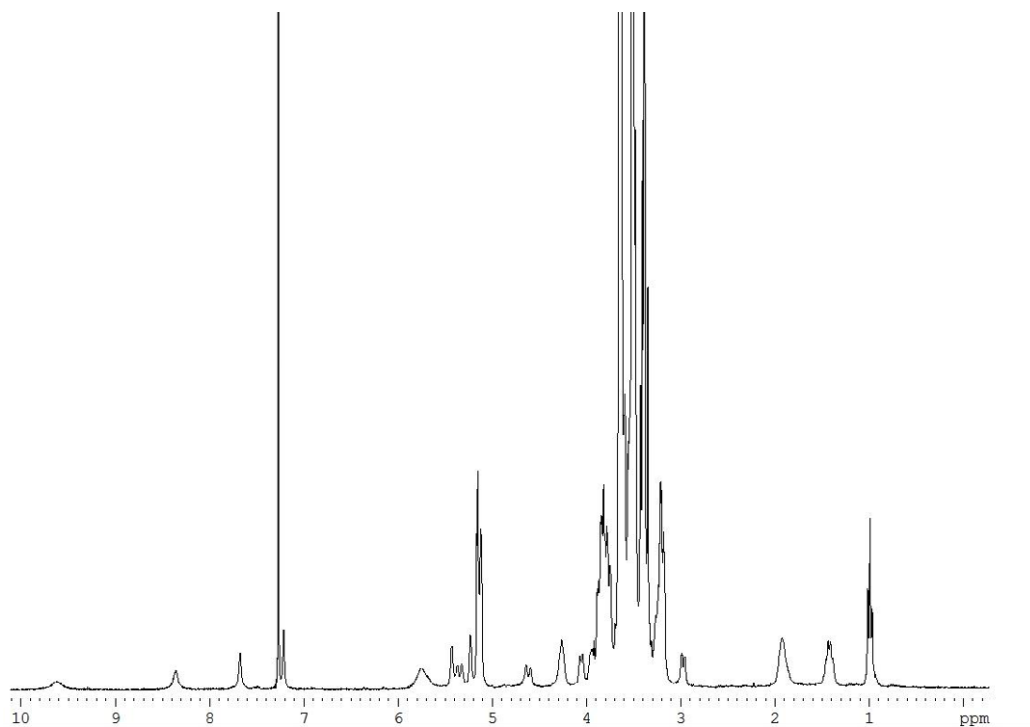

Fig. 13. <sup>1</sup>H NMR (300 MHz, CDCl<sub>3</sub>) of **8**.

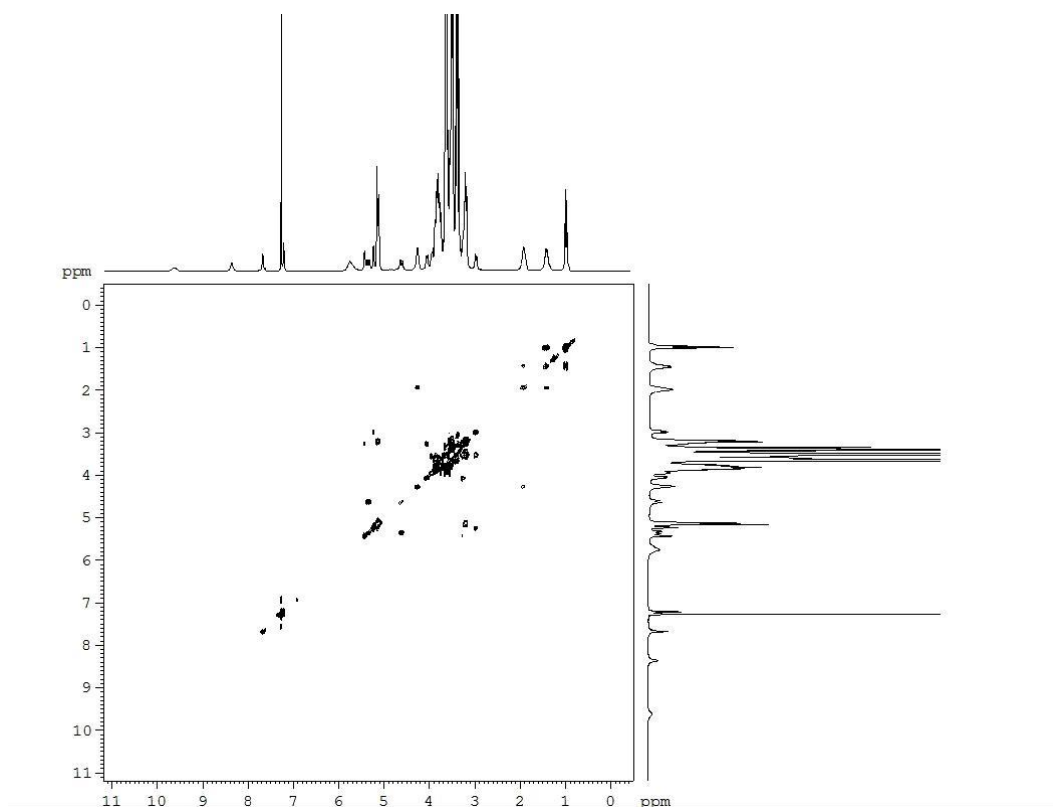

Fig. 14. <sup>1</sup>H-<sup>1</sup>H COSY (300 MHz, CDCl<sub>3</sub>) of **8**.

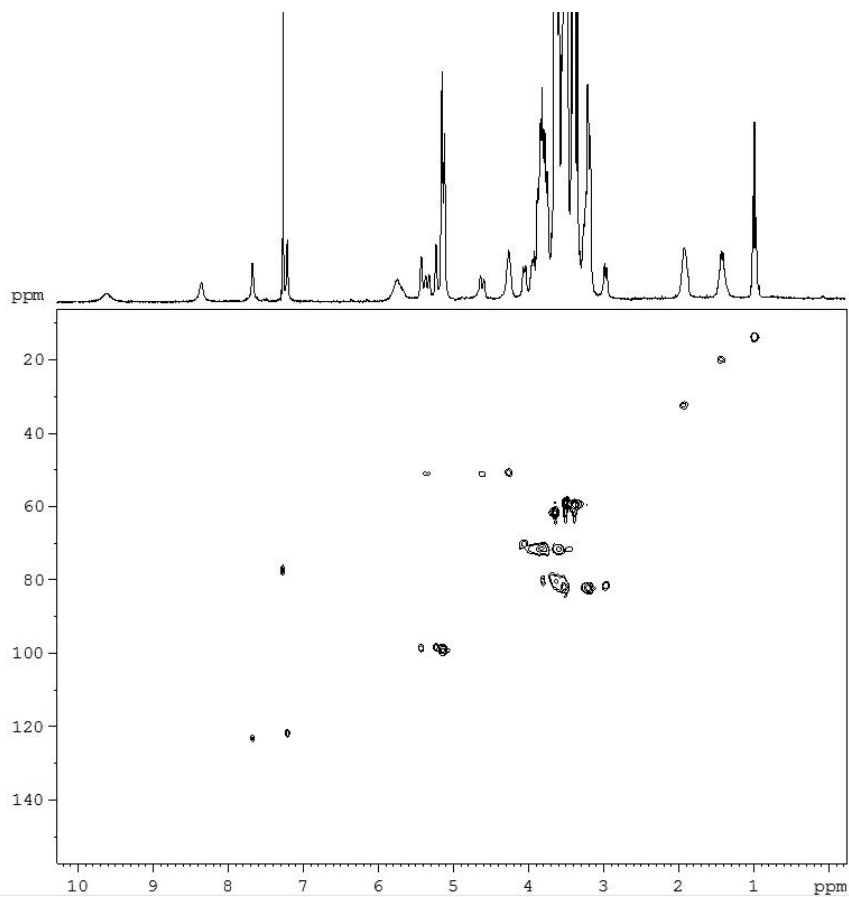

Fig. 15.  $^1\text{H}$ - $^{13}\text{C}$  HSQC (300/75 MHz,  $\text{CDCl}_3$ ) of **8**.

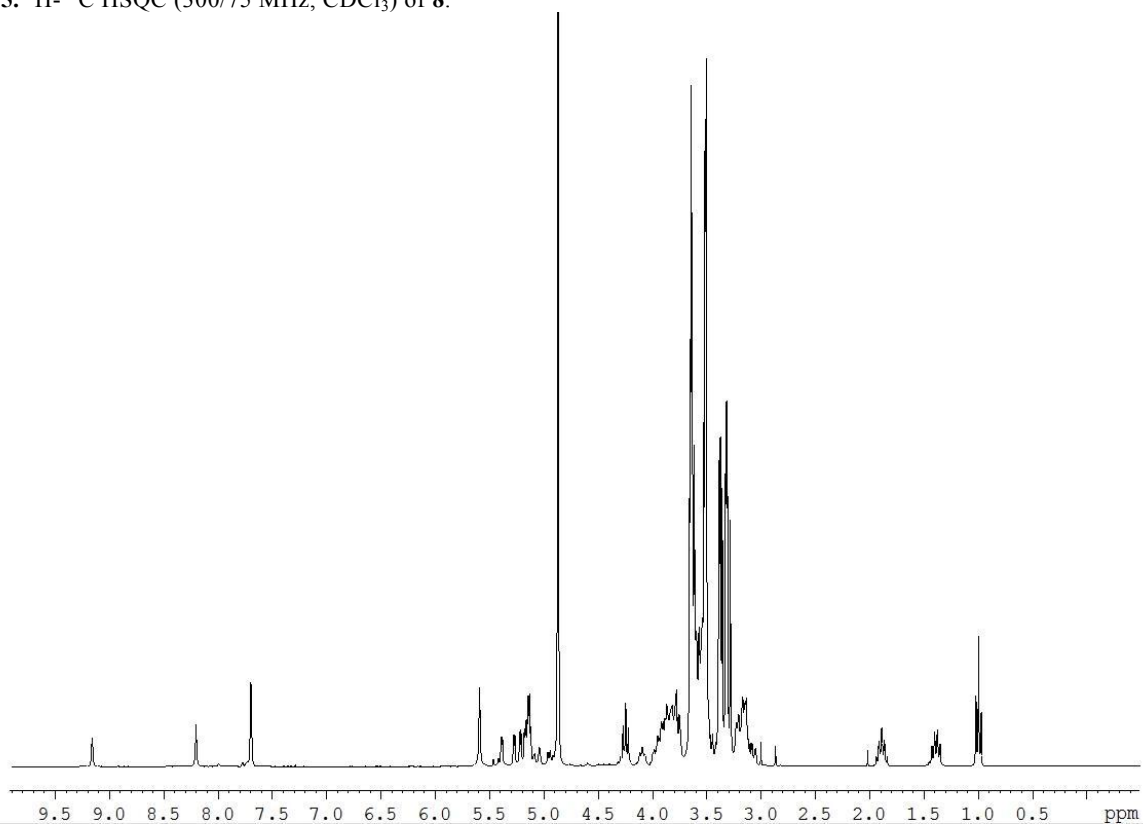

Fig. 16.  $^1\text{H}$  NMR (300 MHz,  $\text{CD}_3\text{OD}$ ) of **8**.

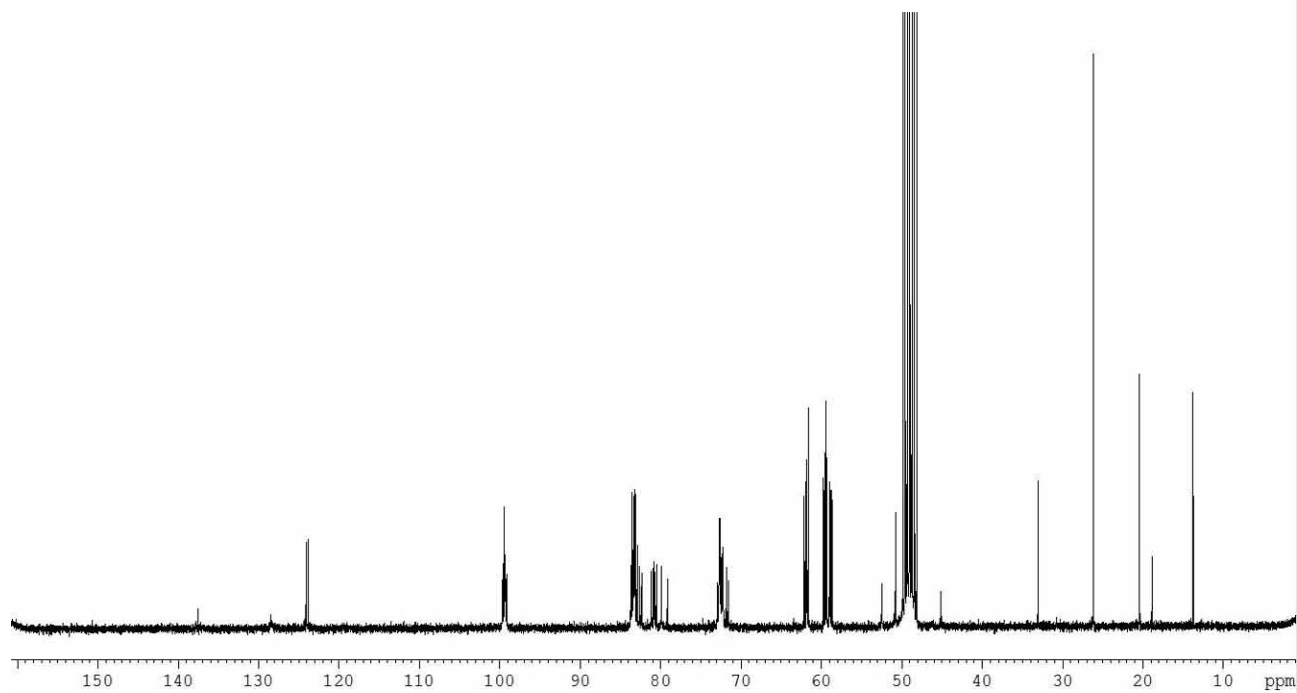

Fig. 17.  $^{13}\text{C}$  NMR (75 MHz,  $\text{CD}_3\text{OD}$ ) of **8**.

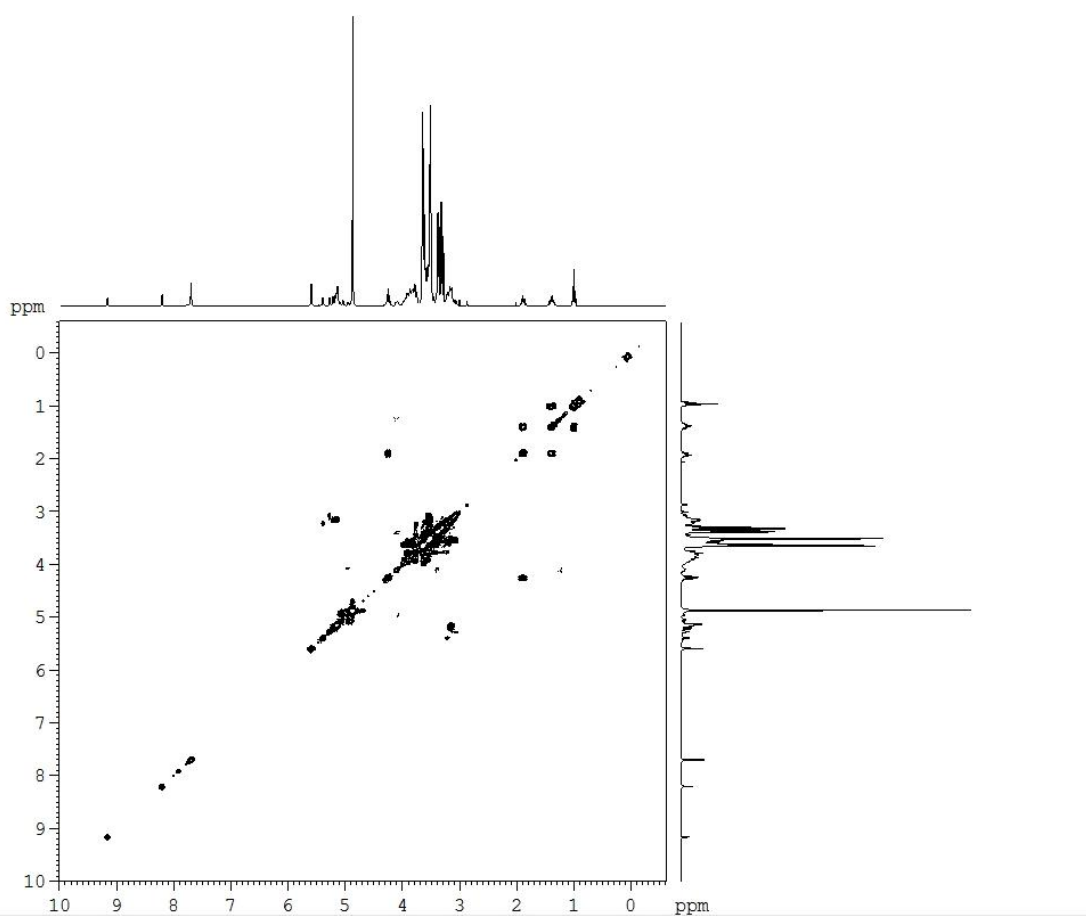

Fig. 18.  $^1\text{H}$ - $^1\text{H}$  COSY (300 MHz,  $\text{CD}_3\text{OD}$ ) of **8**.

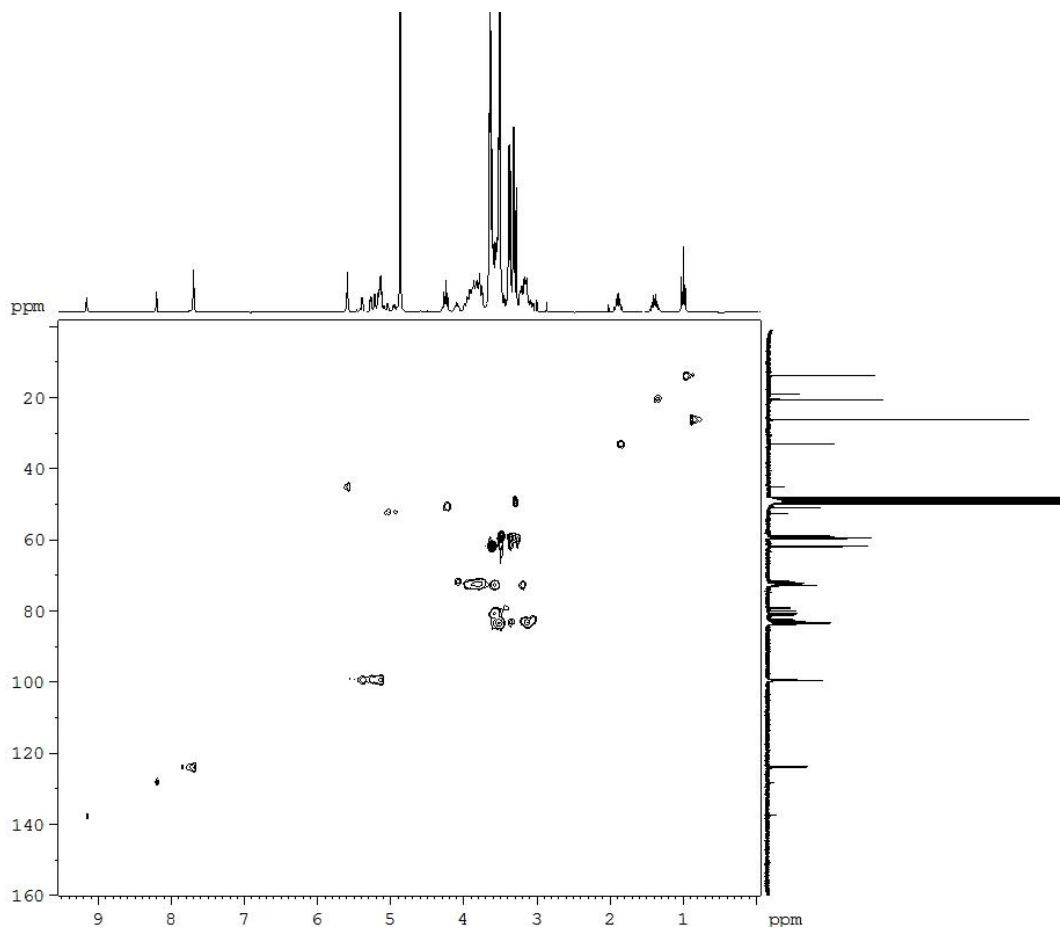

Fig. 19.  $^1\text{H}$ - $^{13}\text{C}$  HSQC (300/75 MHz,  $\text{CD}_3\text{OD}$ ) of **8**.

**1-butyl-3-[3-(1-(6<sup>I</sup>-deoxy-6<sup>II-VII</sup>,2<sup>I-VII</sup>,3<sup>I-VII</sup>-*O*-permethyl- $\beta$ -cyclodextrin-6<sup>I</sup>-yl)triazol-4-yl)propyl]imidazolium chloride (9)**

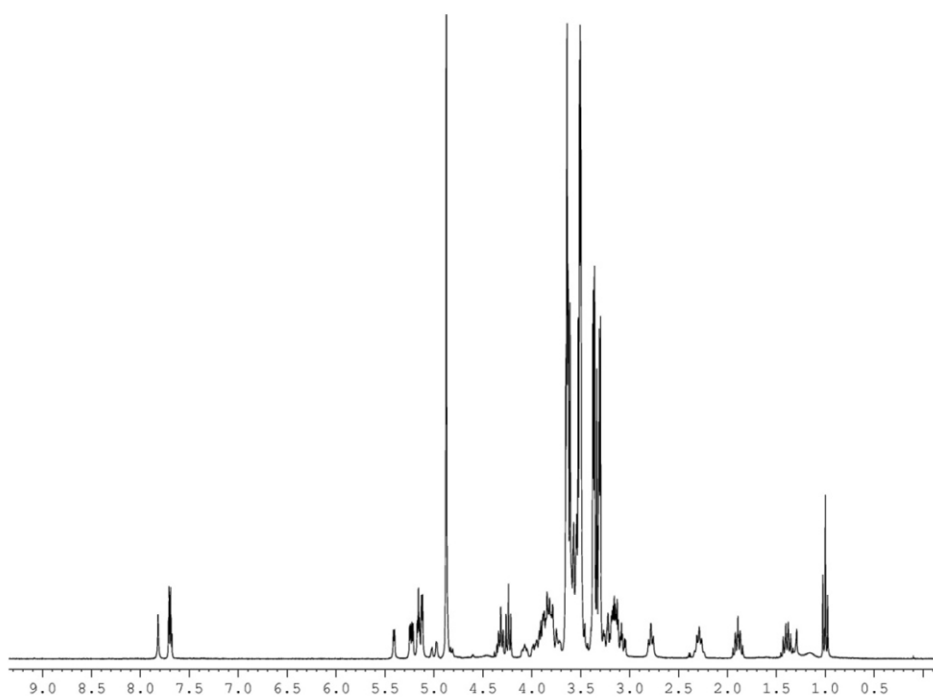

Fig. 20.  $^1\text{H}$  NMR (300 MHz,  $\text{CD}_3\text{OD}$ ) of **9**.

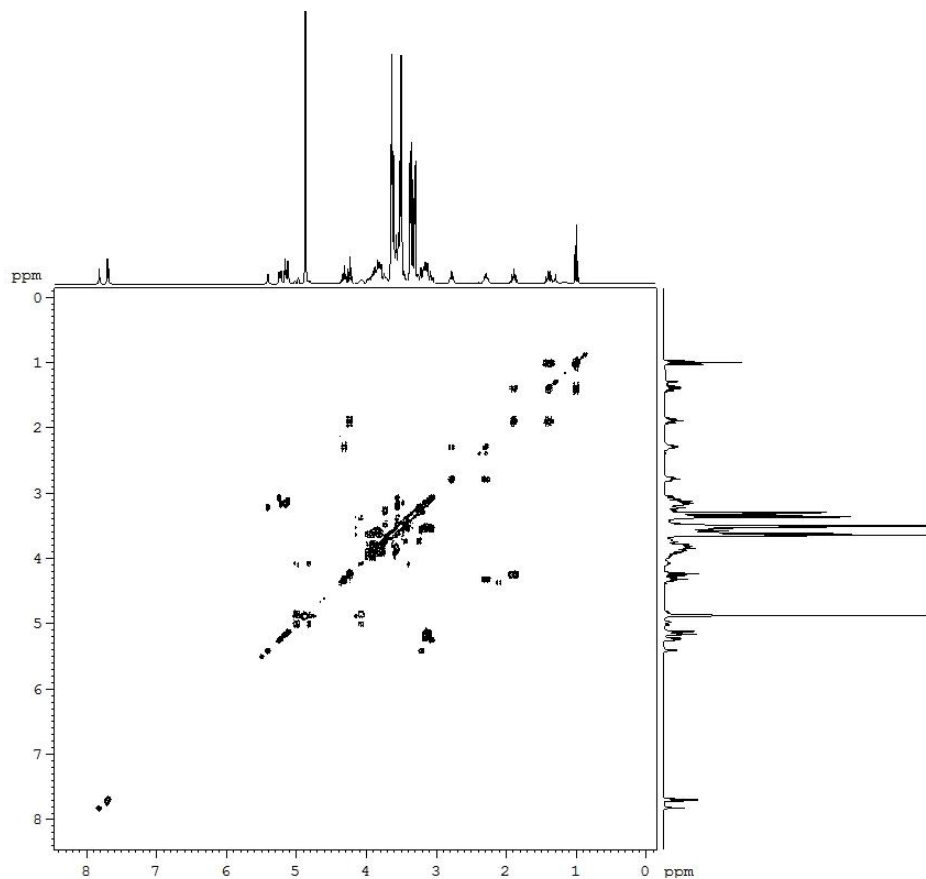

**Fig. 21.**  $^1\text{H}$ - $^1\text{H}$  COSY (300 MHz,  $\text{CD}_3\text{OD}$ ) of **9**.

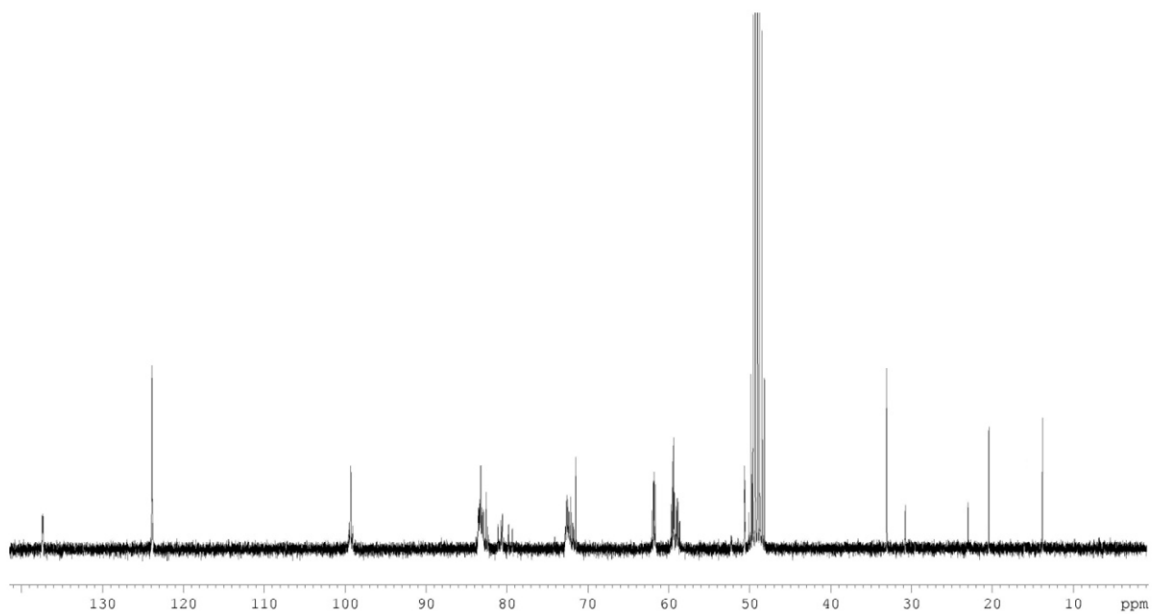

**Fig. 22.**  $^{13}\text{C}$  APT NMR (75 MHz,  $\text{CD}_3\text{OD}$ ) of **9**.



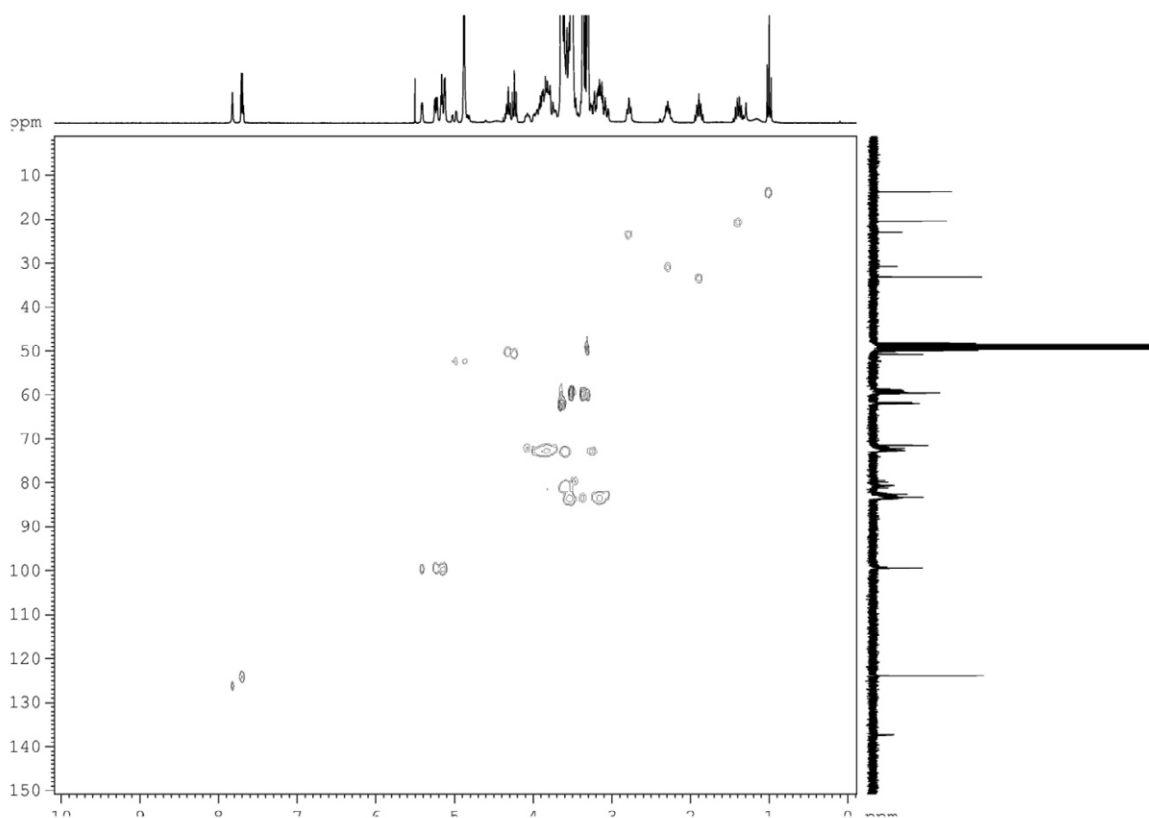

Fig. 23.  $^1\text{H}$ - $^{13}\text{C}$  HSQC (300/75 MHz,  $\text{CD}_3\text{OD}$ ) of **9**.

**1-butyl-3-[1-(6<sup>1</sup>-deoxy-6<sup>H-VII</sup>,2<sup>1-VII</sup>,3<sup>1-VII</sup>-*O*-permethyl- $\beta$ -cyclodextrin-6<sup>1</sup>-yl)triazol-4-ylmethyl]imidazolium hexafluorophosphate (**10**).**

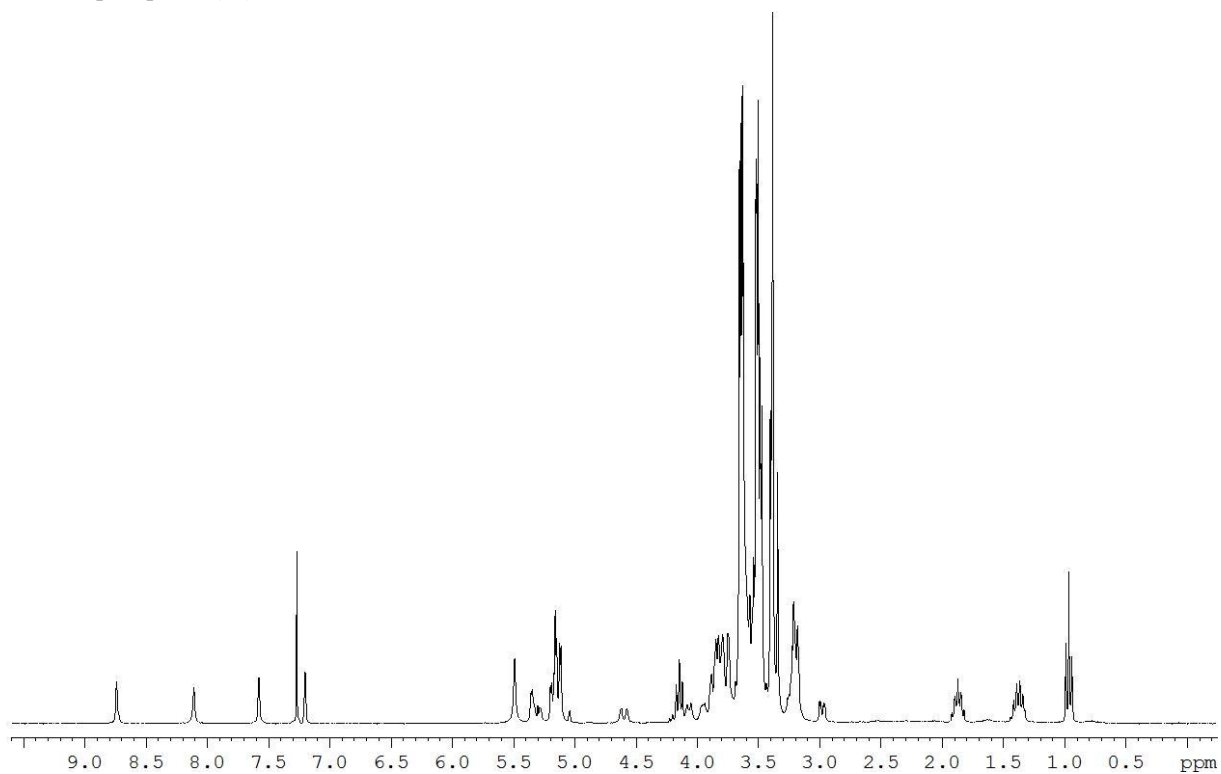

Fig. 24.  $^1\text{H}$  NMR (300 MHz,  $\text{CDCl}_3$ ) of **10**.

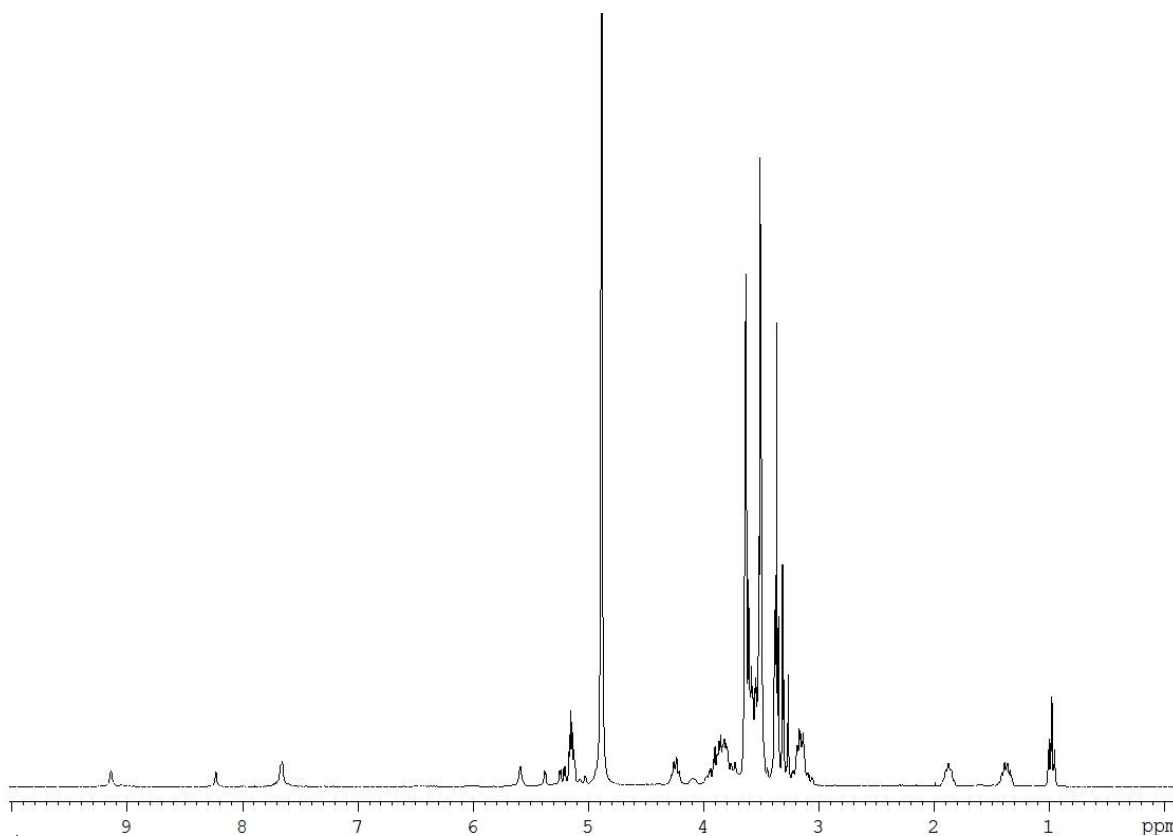

Fig. 25.  $^1\text{H}$  NMR (300 MHz,  $\text{CD}_3\text{OD}$ ) of **10**.

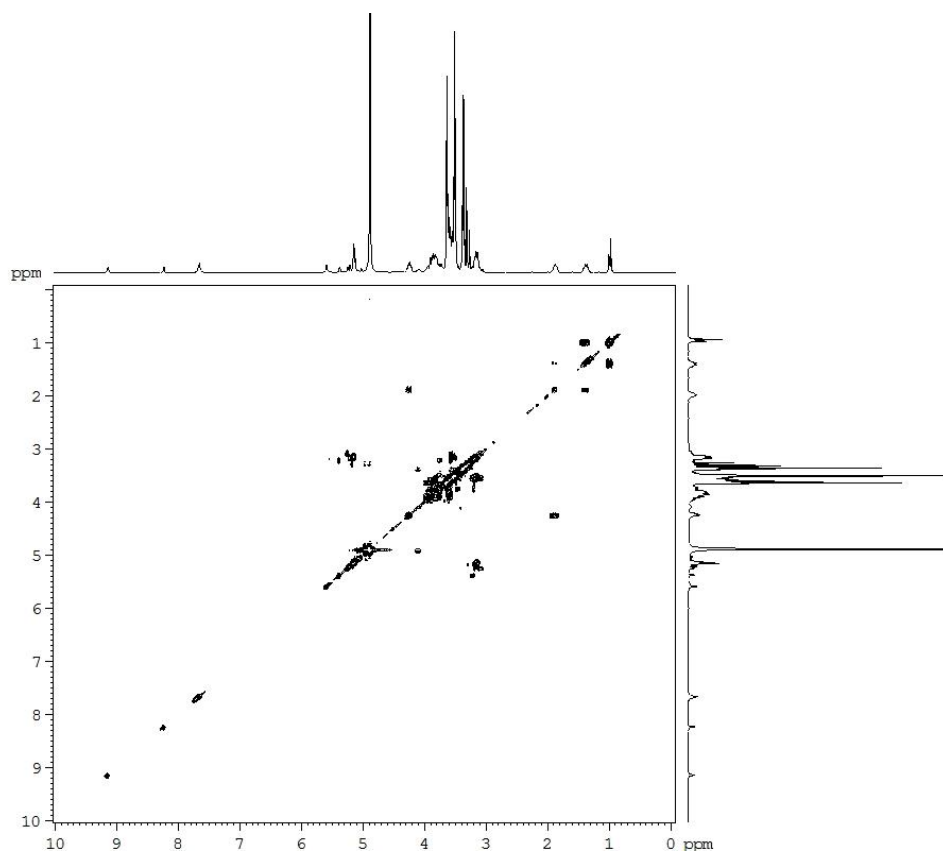

Fig. 26.  $^1\text{H}$ - $^1\text{H}$  COSY (300 MHz,  $\text{CD}_3\text{OD}$ ) of **10**.

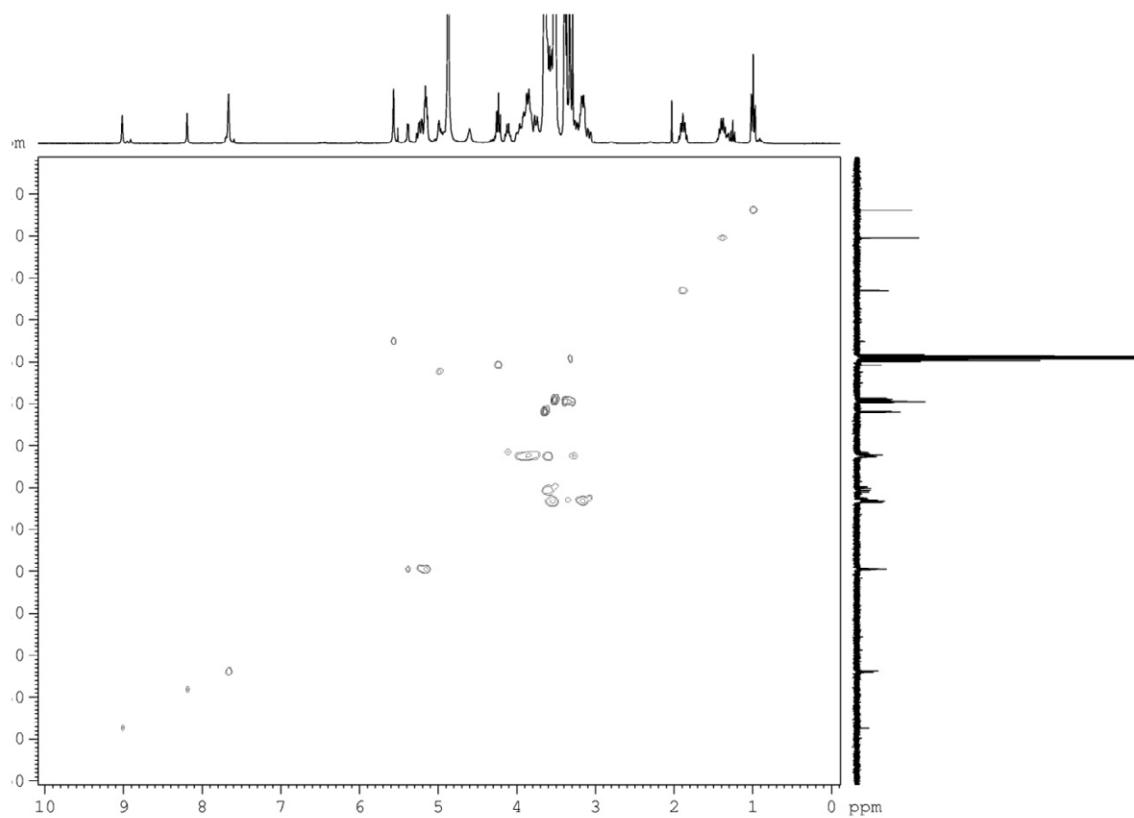

**Fig. 27.**  $^1\text{H}$ - $^{13}\text{C}$  HSQC (300/75 MHz,  $\text{CD}_3\text{OD}$ ) of **10**.

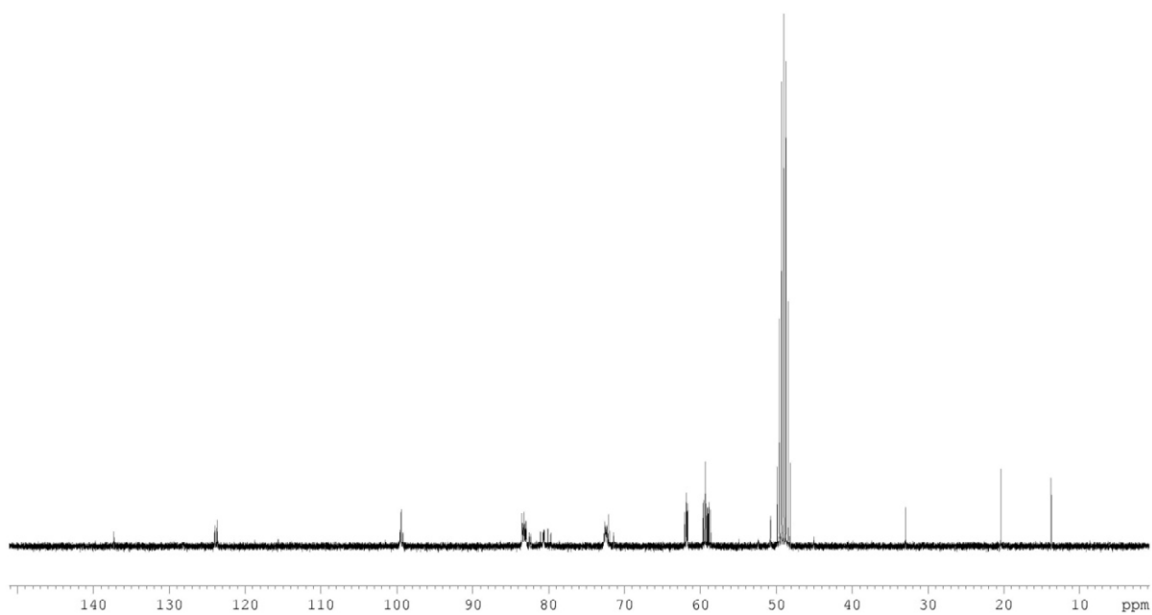

**Fig. 28.**  $^{13}\text{C}$  NMR (75 MHz,  $\text{CD}_3\text{OD}$ ) of **10**.

**1-butyl-3-[3-(1-(6<sup>I</sup>-deoxy-6<sup>II-VII</sup>,2<sup>I-VII</sup>,3<sup>I-VII</sup>-*O*-permethyl- $\beta$ -cyclodextrin-6<sup>I</sup>-yl)triazol-4-yl)propyl]imidazolium hexafluorophosphate (11).**

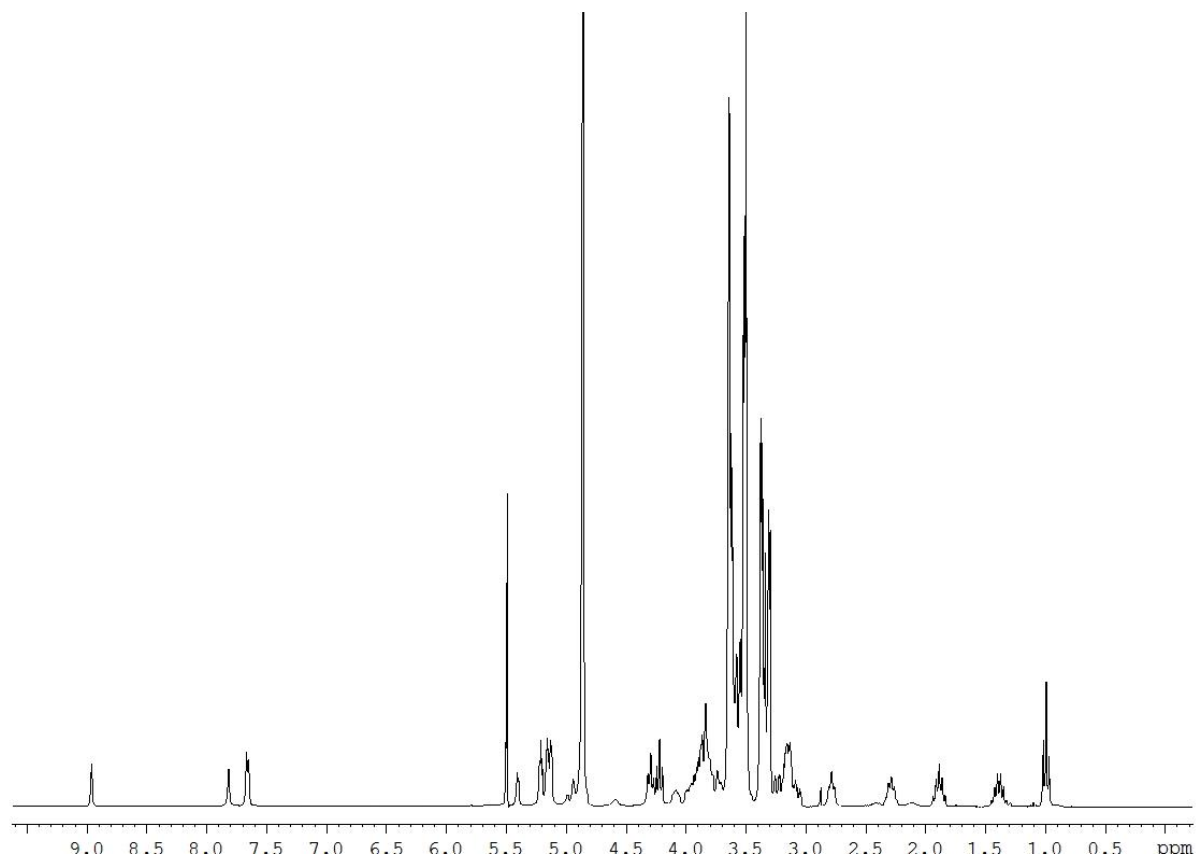

**Fig. 29.** <sup>1</sup>H NMR (300 MHz, CD<sub>3</sub>OD) of **11**.

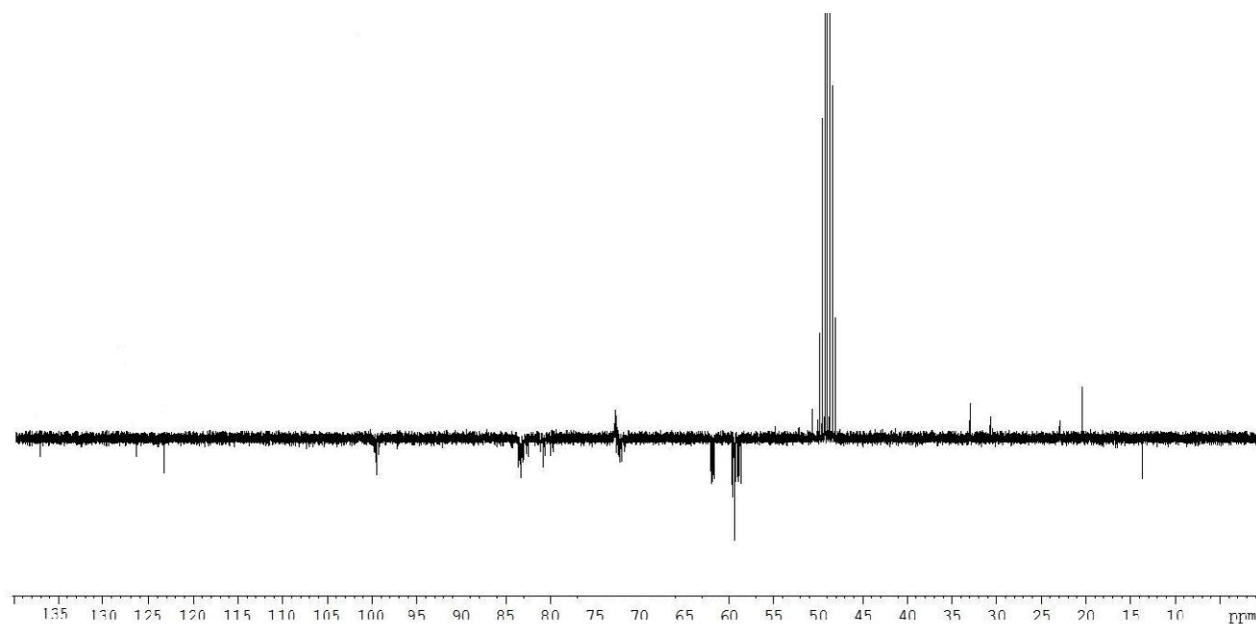

**Fig. 30.** <sup>13</sup>C APT NMR (75 MHz, CD<sub>3</sub>OD) of **11**.

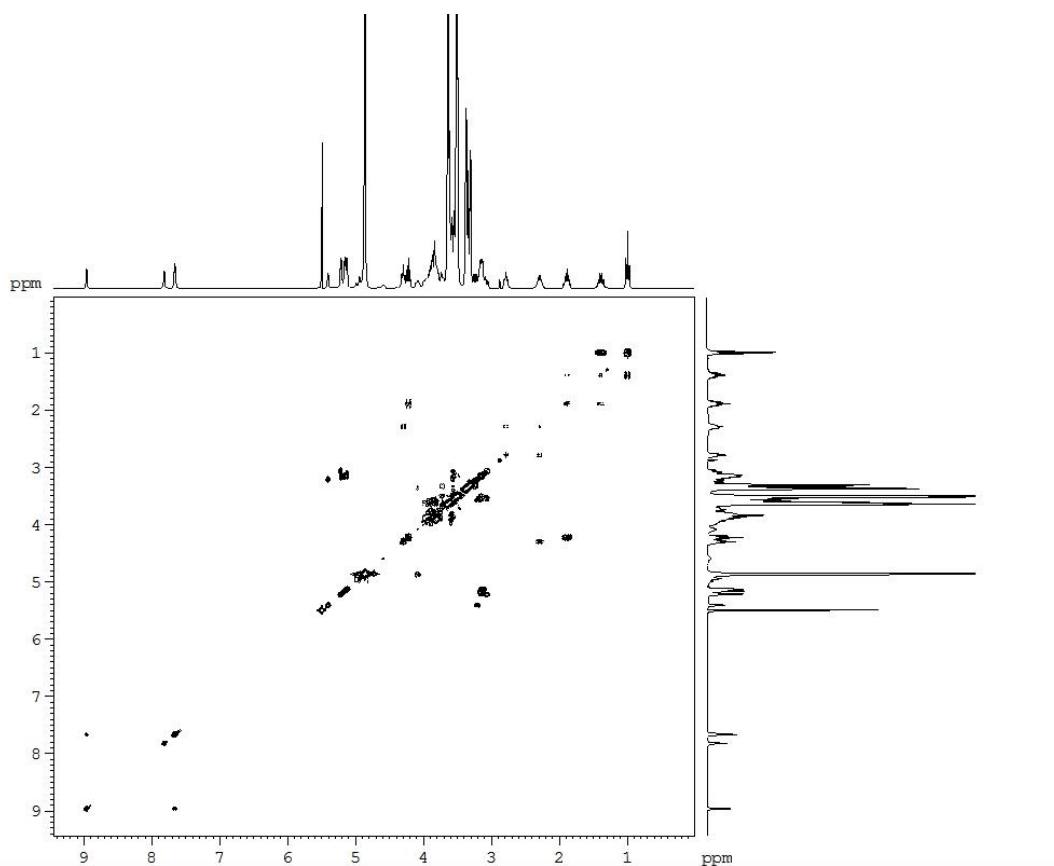

Fig. 31.  $^1\text{H}$ - $^1\text{H}$  COSY (300 MHz,  $\text{CD}_3\text{OD}$ ) of 11.

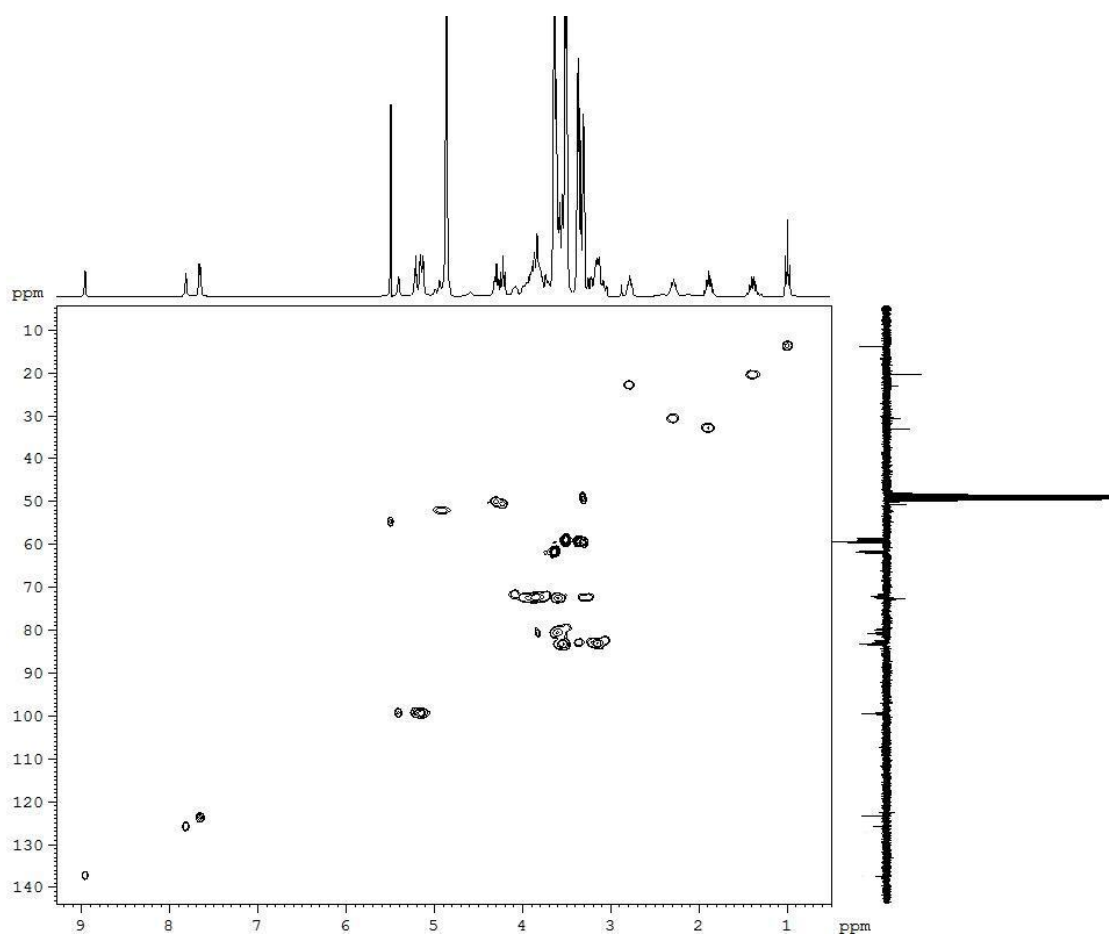

Fig. 32.  $^1\text{H}$ - $^{13}\text{C}$  HSQC (300/75 MHz,  $\text{CD}_3\text{OD}$ ) of 11.

**1-butyl-3-[1-(6<sup>l</sup>-deoxy-β-cyclodextrin-6<sup>l</sup>-yl)triazol-4-yl methyl]imidazolium bromide (3).**

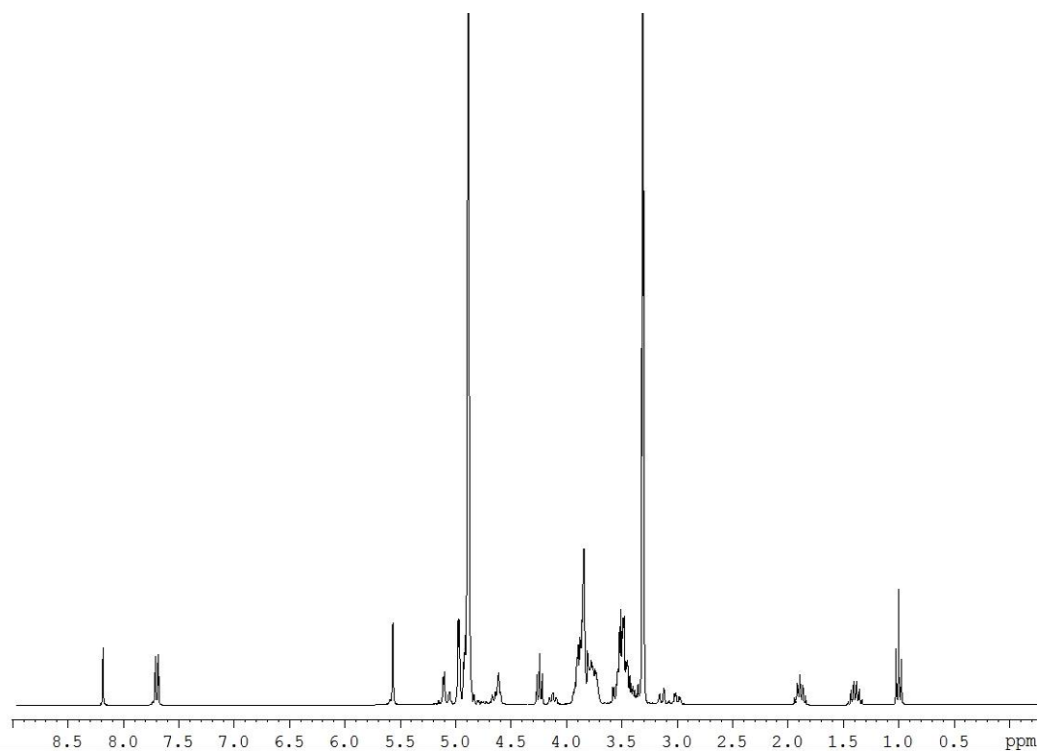

**Fig. 33.** <sup>1</sup>H NMR (300 MHz, CD<sub>3</sub>OD) of **3**.

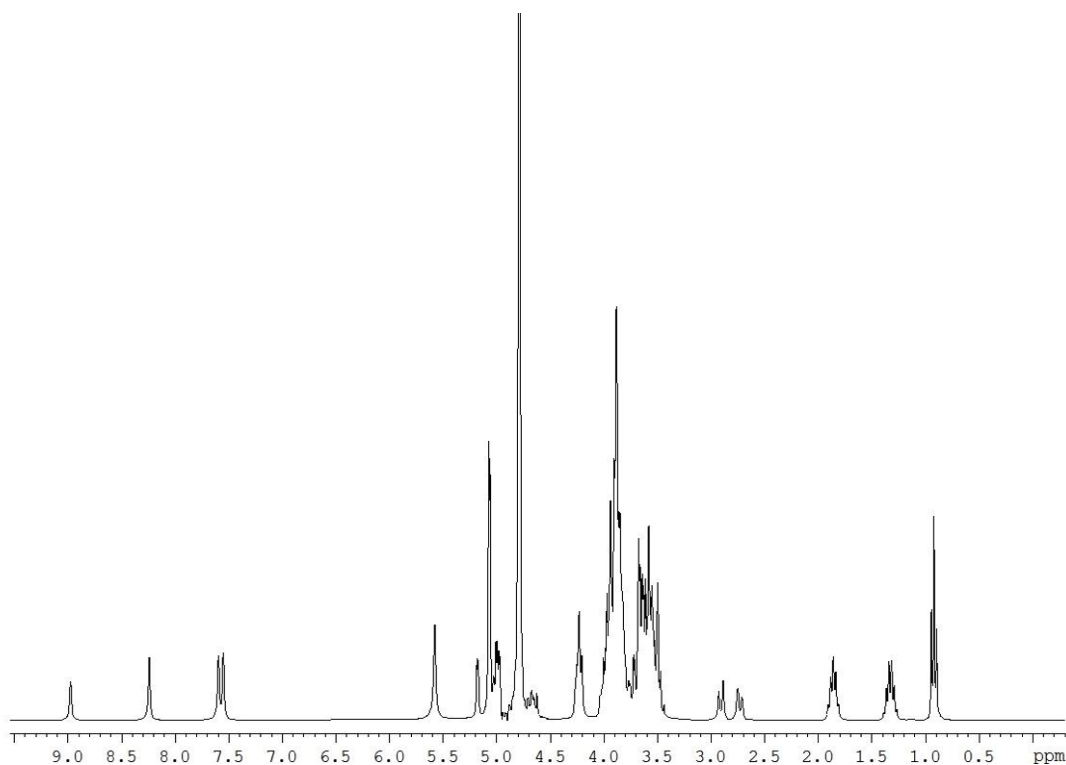

**Fig. 34.** <sup>1</sup>H NMR (300 MHz, D<sub>2</sub>O) of **3**.

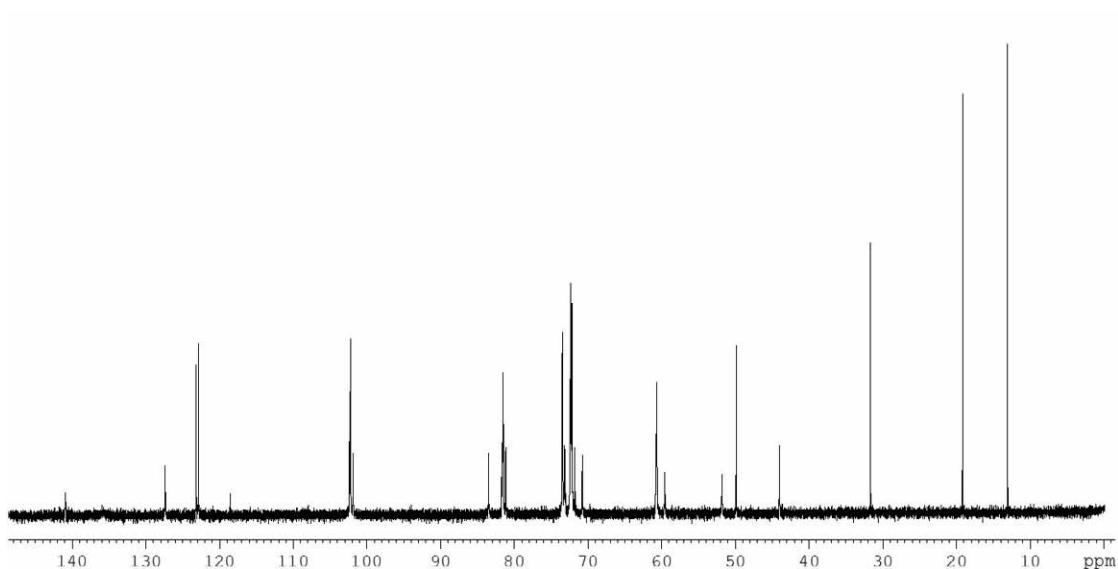

Fig. 35.  $^{13}\text{C}$  NMR (75 MHz,  $\text{D}_2\text{O}$ ) of **3**.

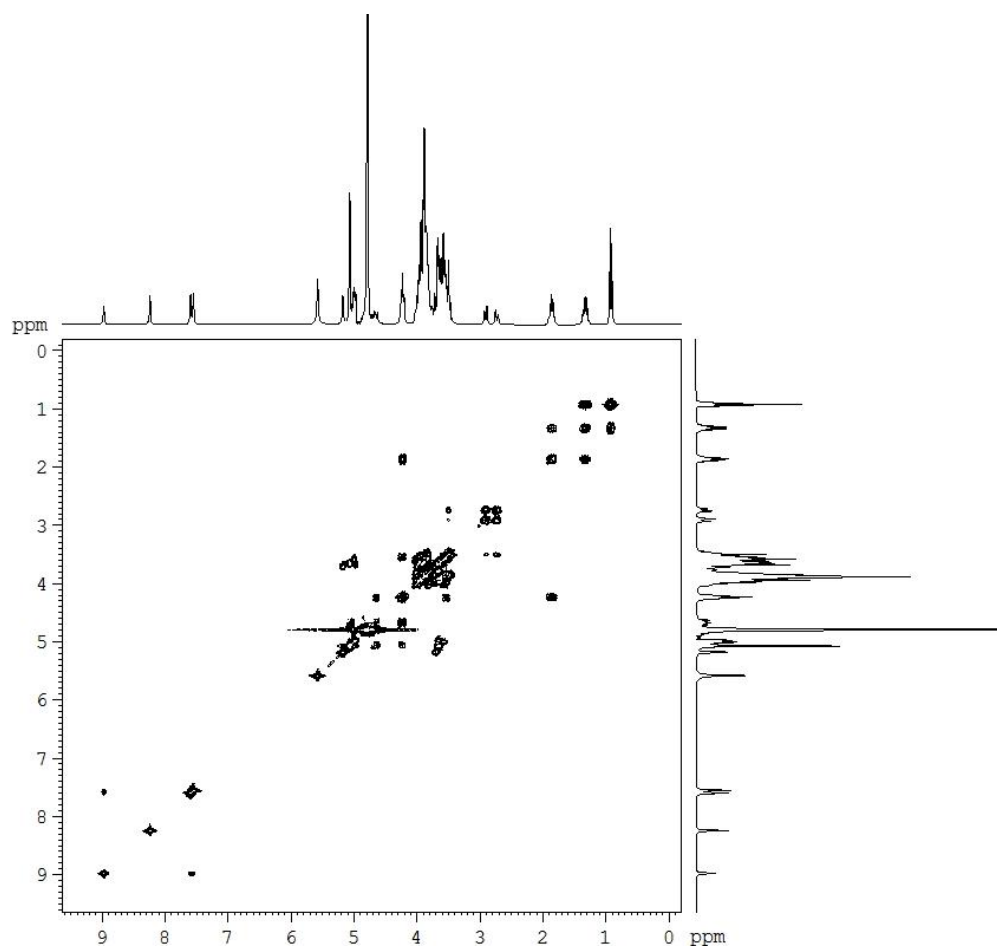

Fig. 36.  $^1\text{H}$ - $^1\text{H}$  COSY (300 MHz,  $\text{D}_2\text{O}$ ) of **3**.

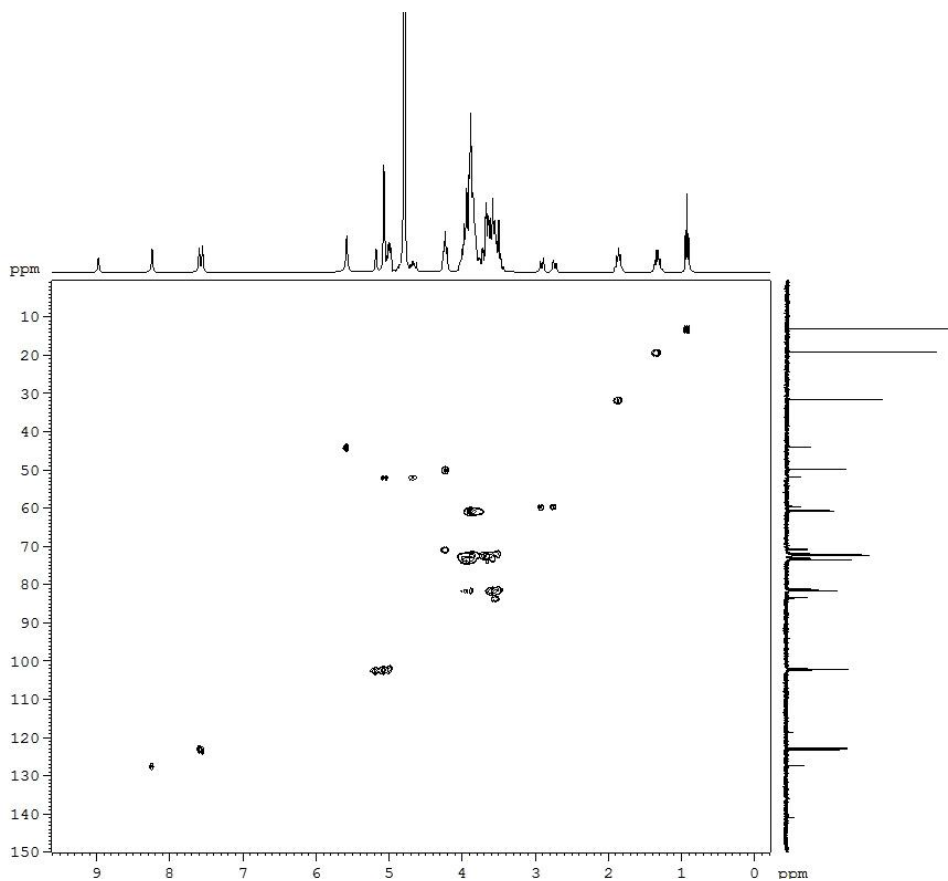

Fig. 37.  $^1\text{H}$ - $^{13}\text{C}$  HSQC (300/75 MHz,  $\text{D}_2\text{O}$ ) of **3**.

**1-butyl-3-[3-(1-(6<sup>1</sup>-deoxy- $\beta$ -cyclodextrin-6<sup>1</sup>-yl)triazol-4-yl) propyl]imidazolium chloride (**4**).**

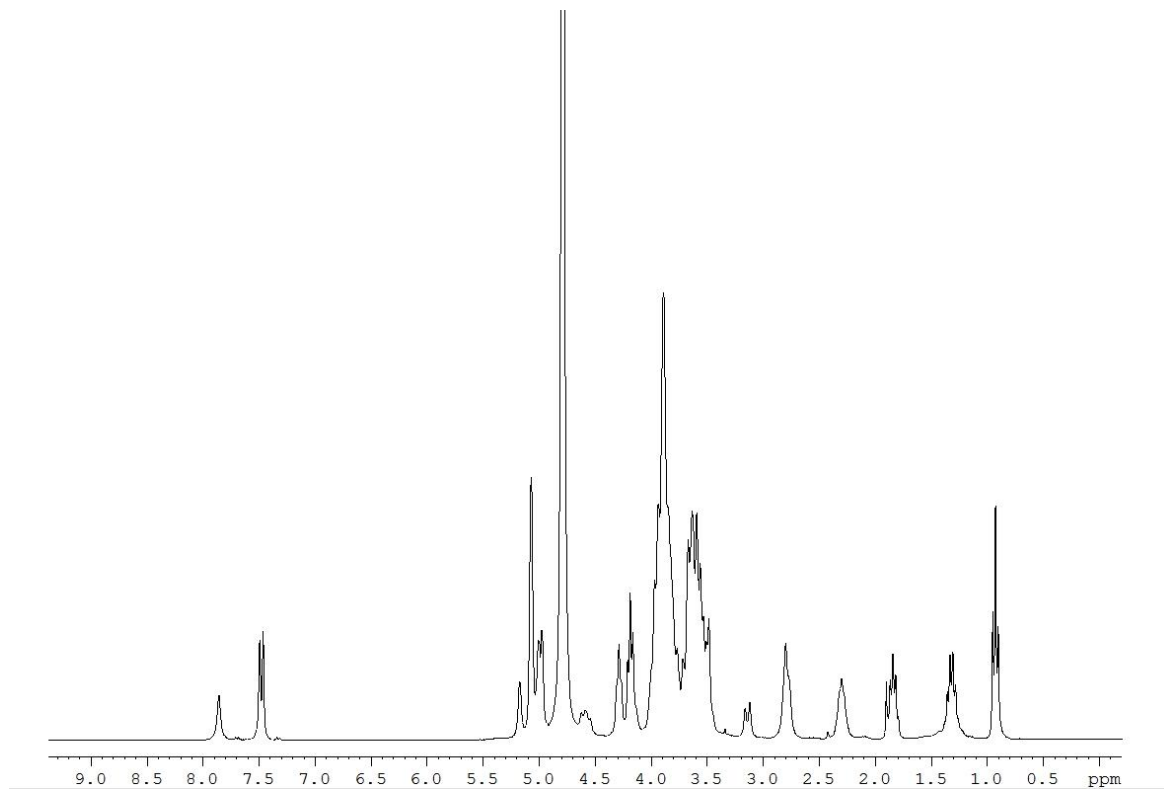

Fig. 38.  $^1\text{H}$  NMR (300 MHz,  $\text{D}_2\text{O}$ ) of **4**.



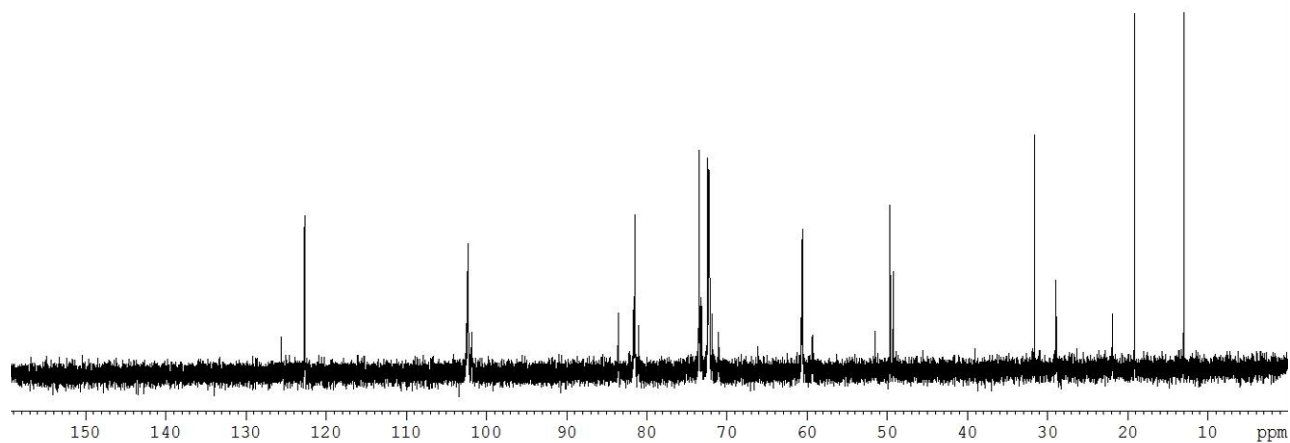

**Fig. 39.**  $^{13}\text{C}$  NMR (75 MHz,  $\text{D}_2\text{O}$ ) of **4**.

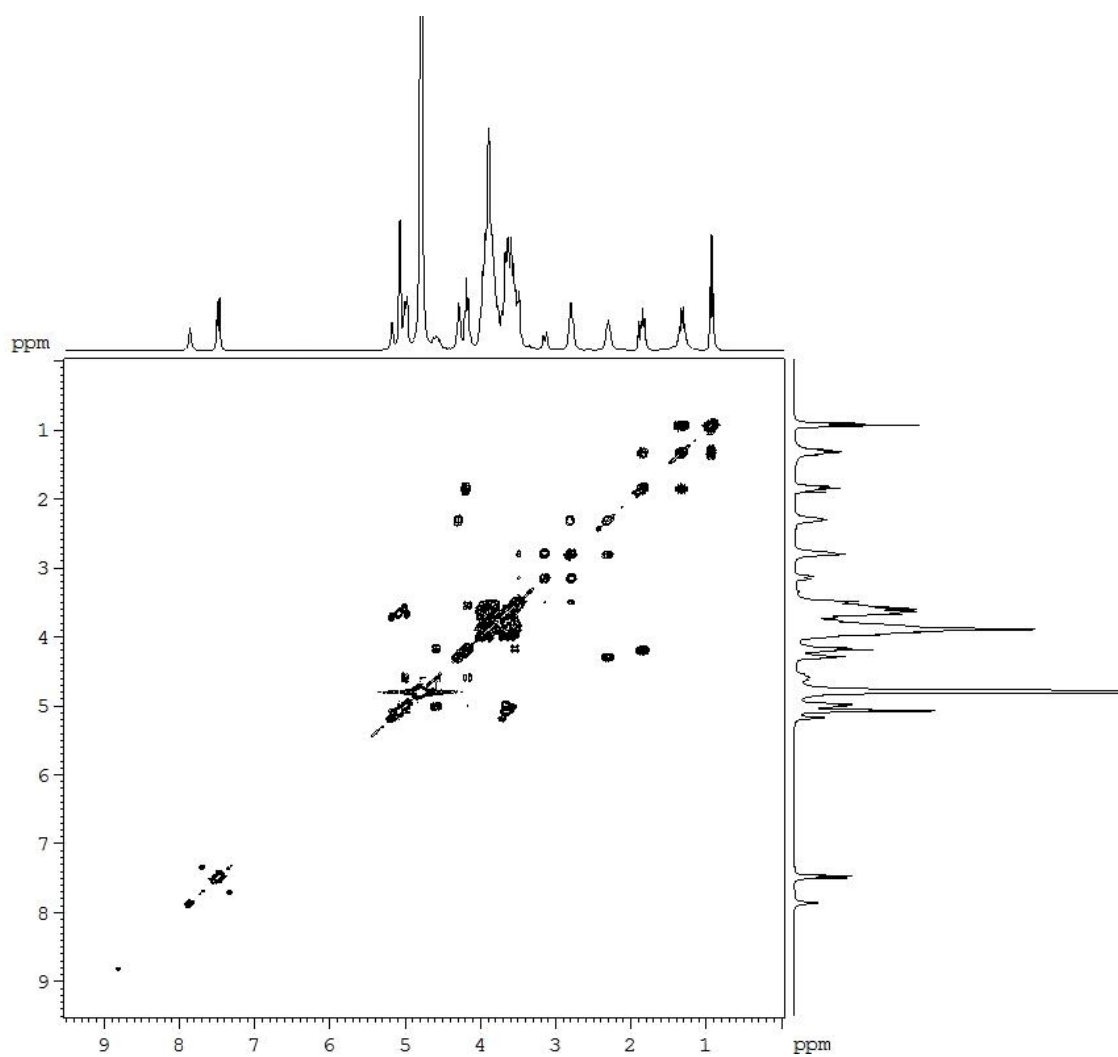

**Fig. 40.**  $^1\text{H}$ - $^1\text{H}$  COSY (300 MHz,  $\text{D}_2\text{O}$ ) of **4**.

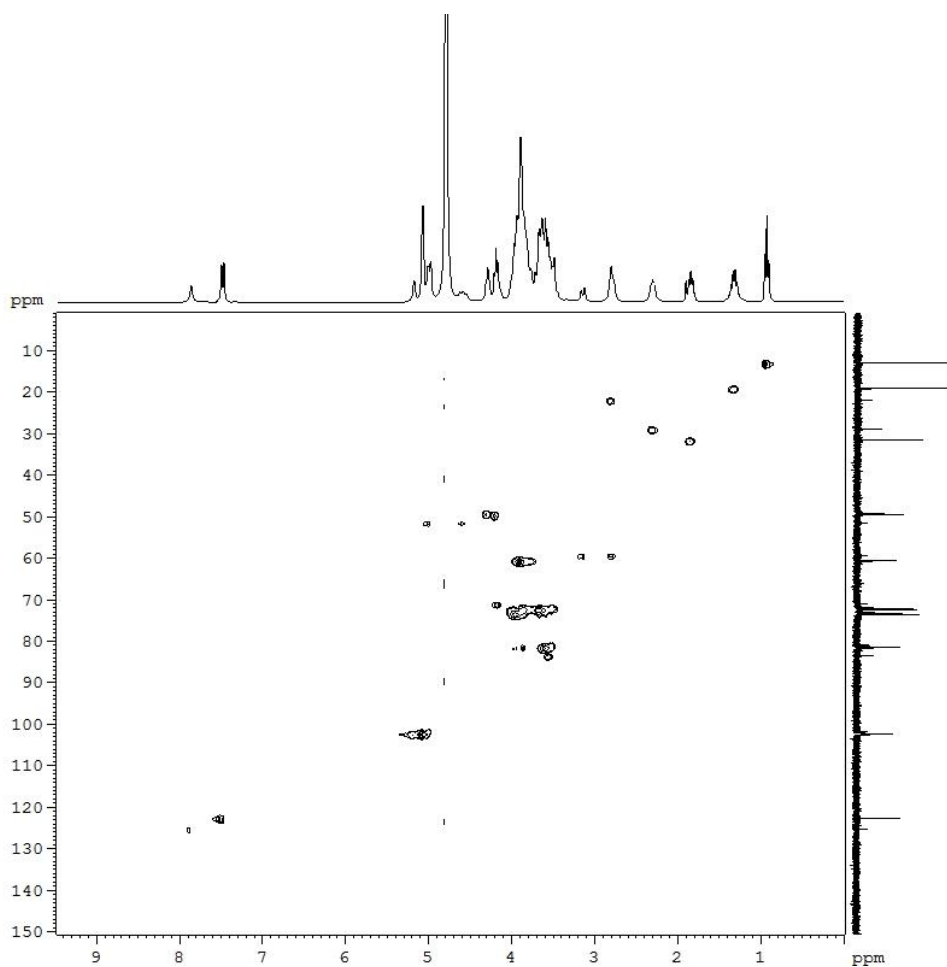

**Fig. 41.**  $^1\text{H}$ - $^{13}\text{C}$  HSQC (300/75 MHz,  $\text{D}_2\text{O}$ ) of 4.

**1-butyl-3-[1-(6<sup>1</sup>-deoxy- $\beta$ -cyclodextrin-6<sup>1</sup>-yl)triazol-4-ylmethyl]imidazolium hexafluorophosphate (5).**

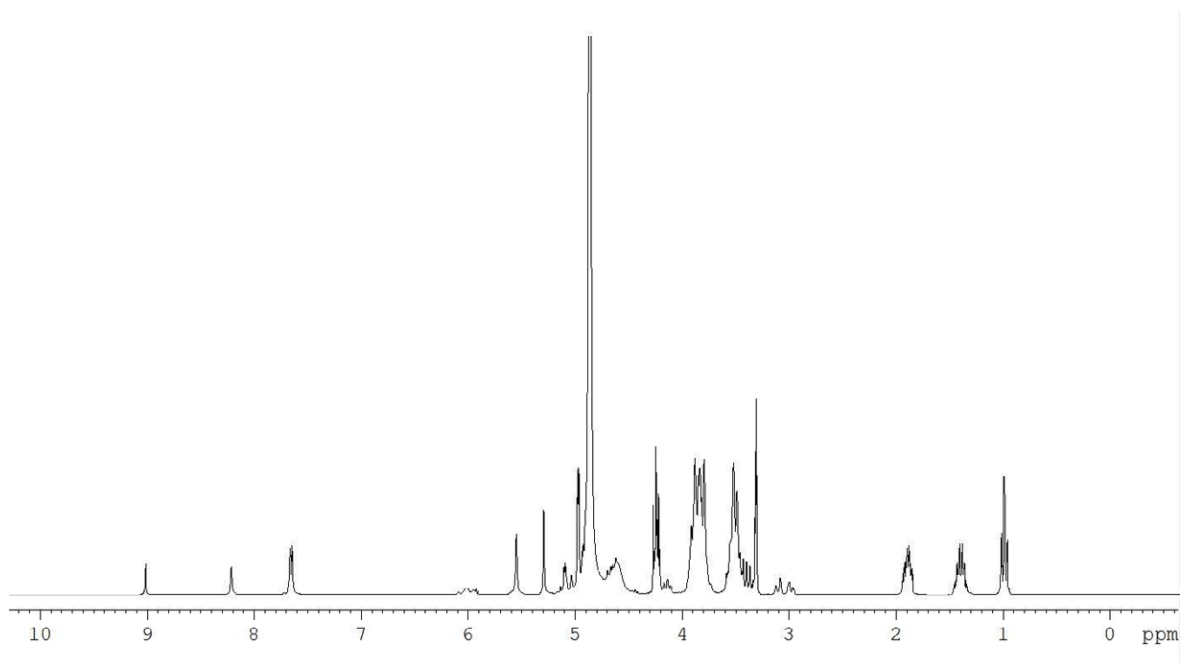

**Fig. 42.**  $^1\text{H}$  NMR (300 MHz,  $\text{CD}_3\text{OD}$ ) of 5.

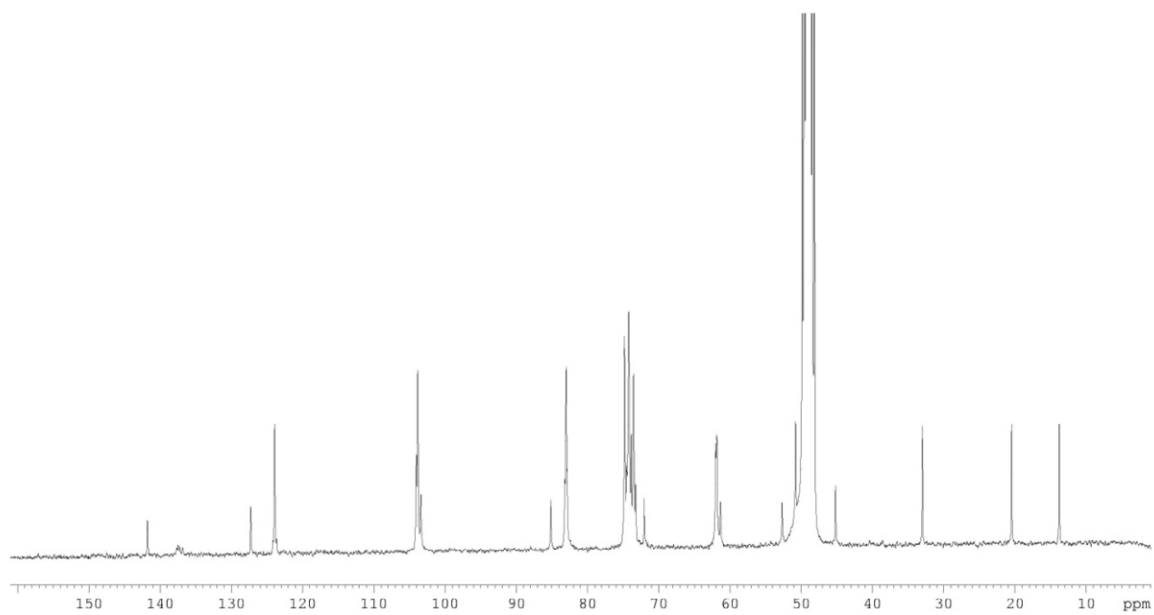

**Fig. 43.**  $^{13}\text{C}$  NMR (75 MHz,  $\text{CD}_3\text{OD}$ ) of **5**.

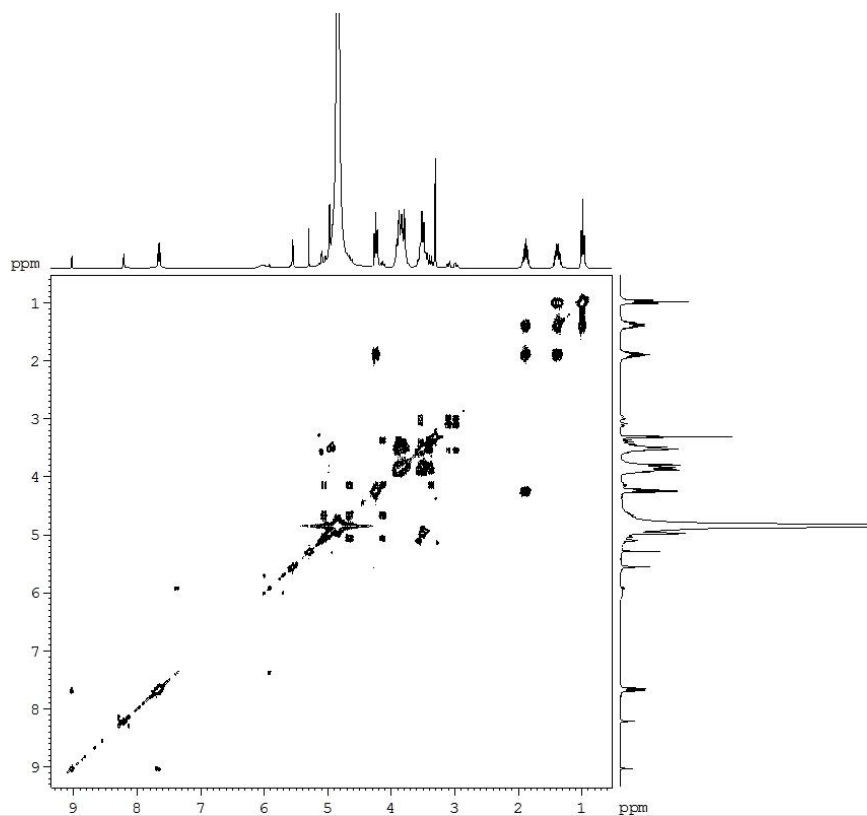

**Fig. 44.**  $^1\text{H}$ - $^1\text{H}$  COSY (300 MHz,  $\text{CD}_3\text{OD}$ ) of **5**.

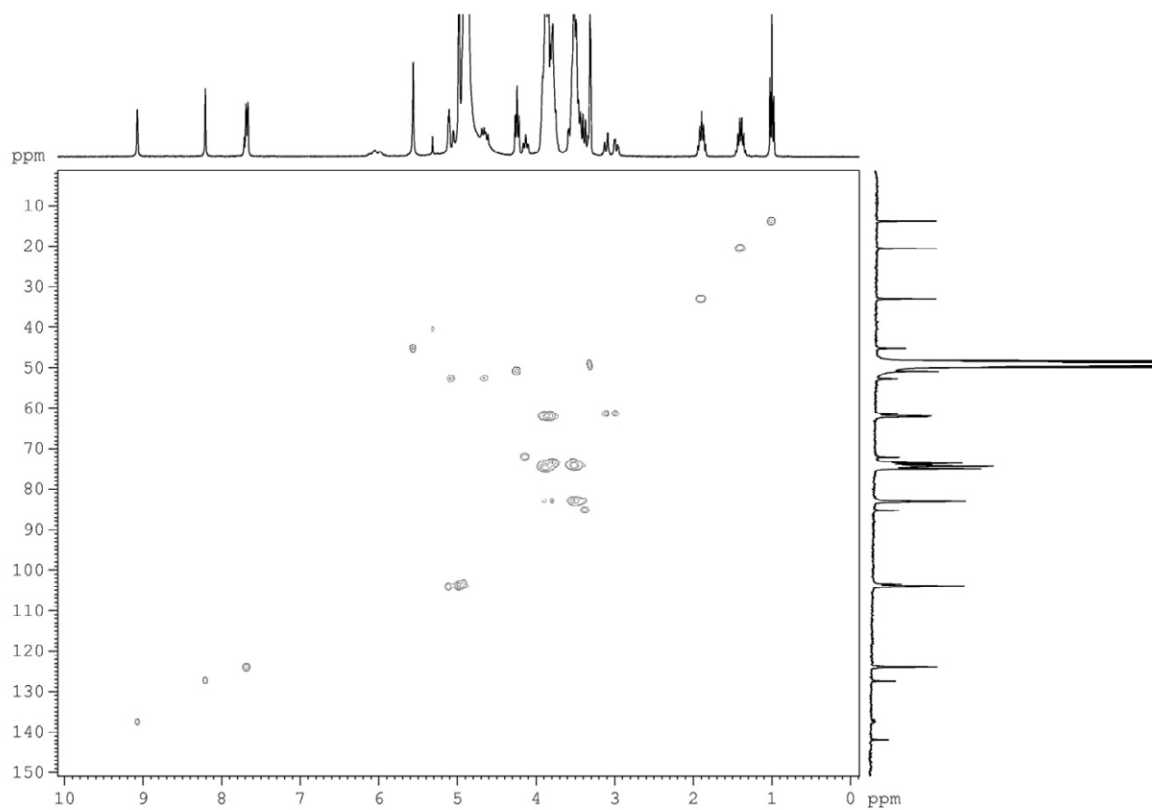

**Fig. 45.**  $^1\text{H}$ - $^{13}\text{C}$  HSQC (300/75 MHz,  $\text{CD}_3\text{OD}$ ) of **5**.

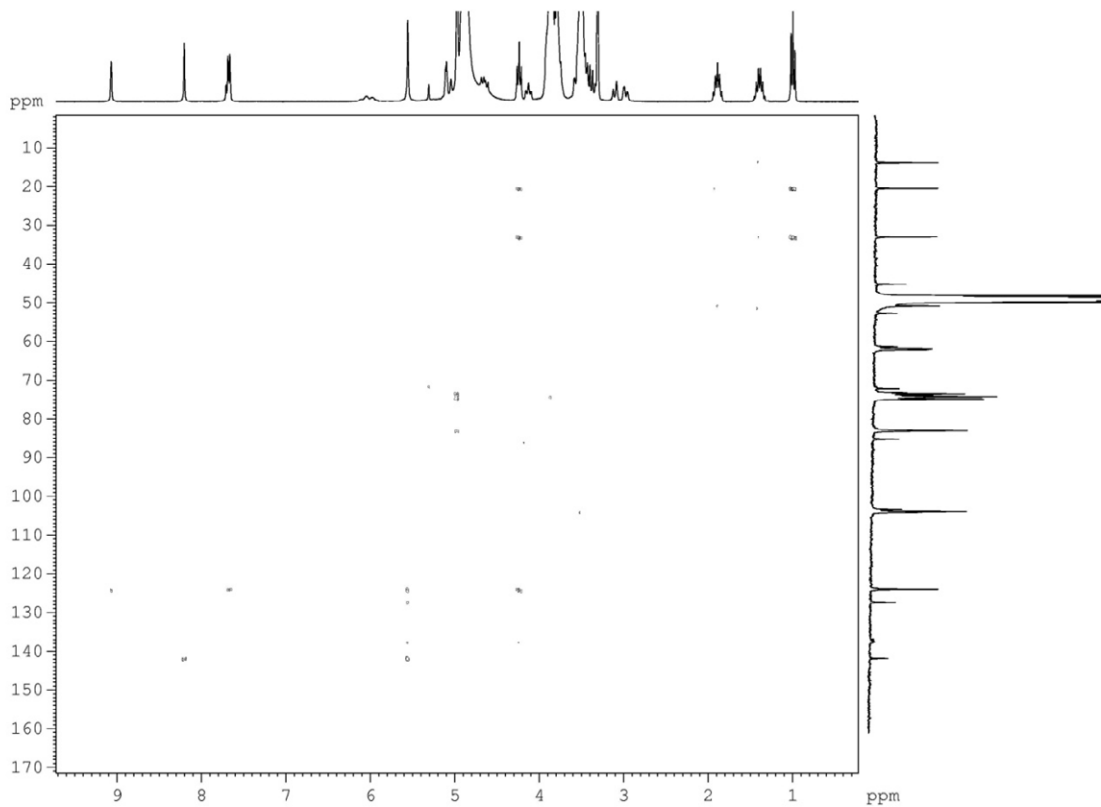

**Fig. 46.**  $^1\text{H}$ - $^{13}\text{C}$  HMBC (300/75 MHz,  $\text{CD}_3\text{OD}$ ) ( $J_{\text{H-C}}^3 = 8$  Hz) of **5**.

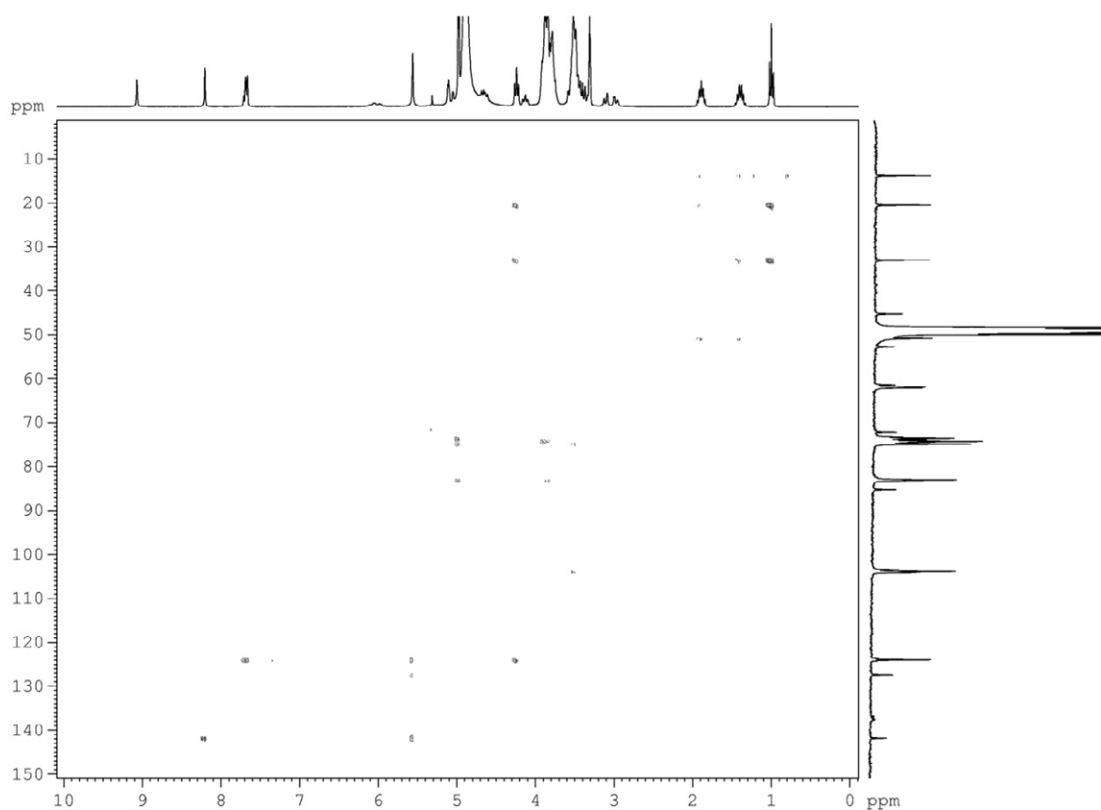

**Fig. 47.** <sup>1</sup>H-<sup>13</sup>C HMBC (300/75 MHz, CD<sub>3</sub>OD) ( $J^3_{H-C} = 10$  Hz) of **5**.

**1-butyl-3-[3-(1-(6<sup>1</sup>-deoxy-β-cyclodextrin-6<sup>1</sup>-yl)triazol-4-yl) propyl]imidazolium hexafluorophosphate (**6**).**

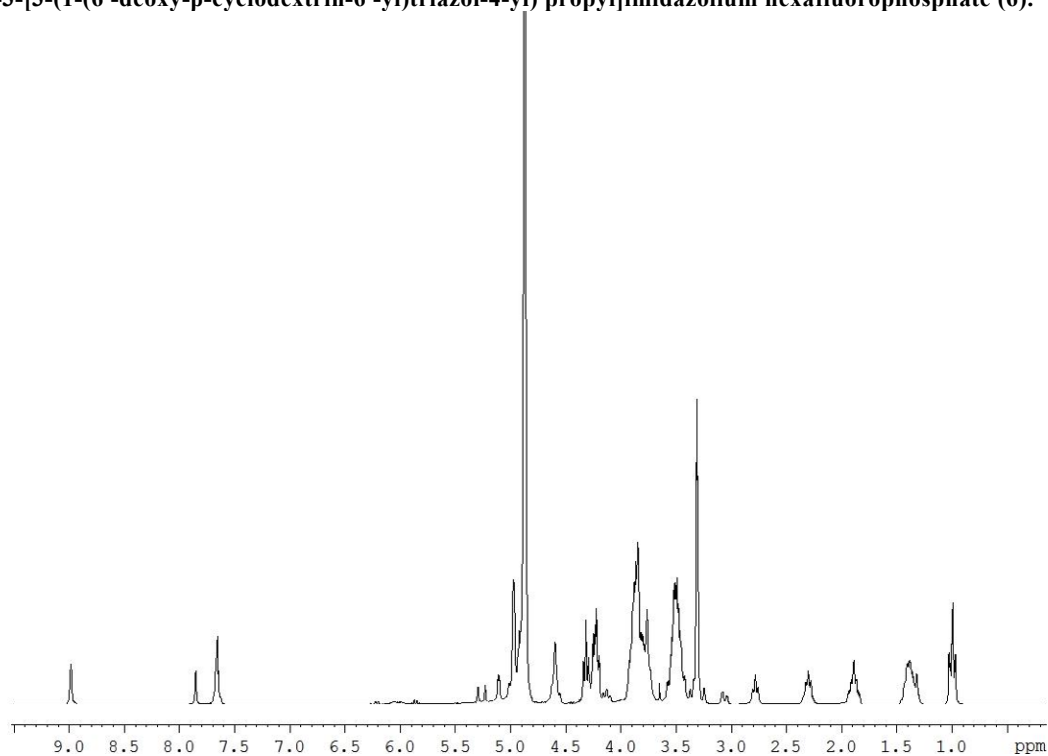

**Fig. 48.** <sup>1</sup>H NMR (300 MHz, CD<sub>3</sub>OD) of **6**.

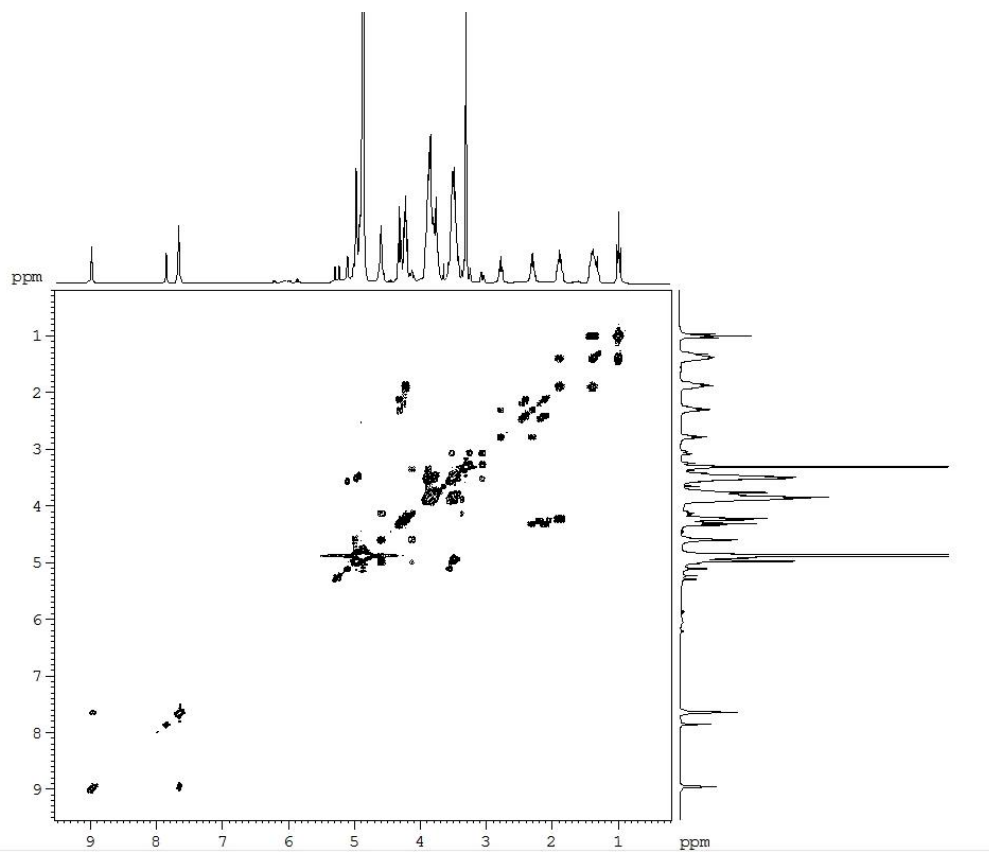

Fig. 49.  $^1\text{H}$ - $^1\text{H}$  COSY (300 MHz,  $\text{CD}_3\text{OD}$ ) of 6.

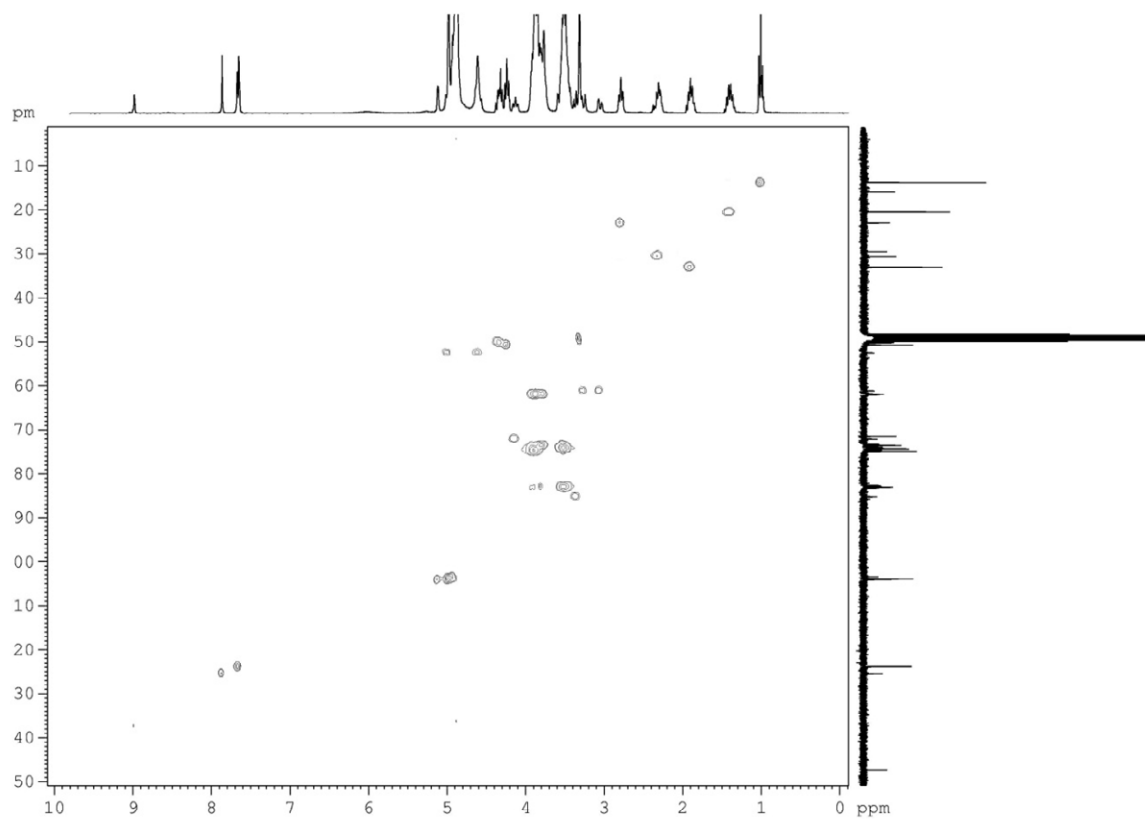

Fig. 50.  $^1\text{H}$ - $^{13}\text{C}$  HSQC (300/75 MHz,  $\text{CD}_3\text{OD}$ ) of 6.

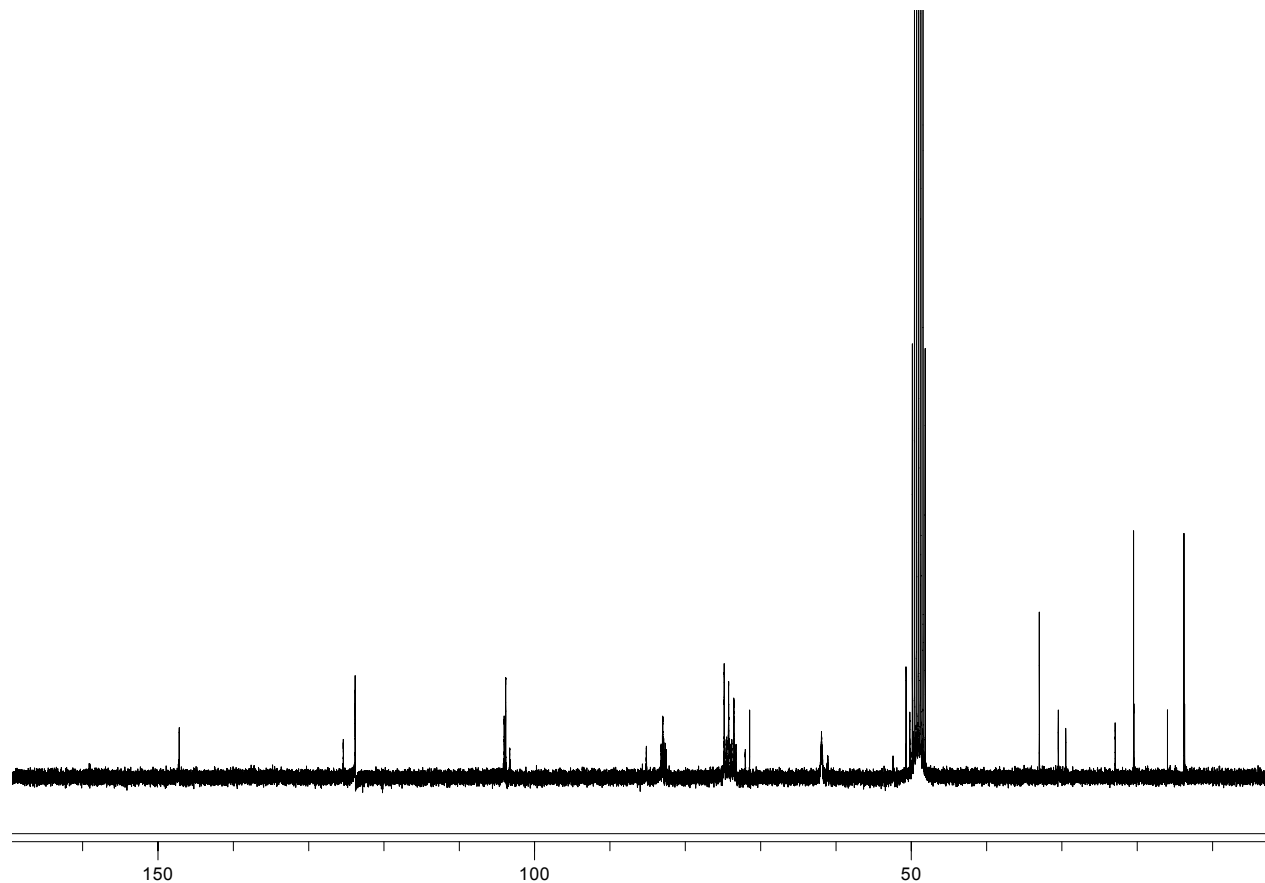

Fig. 51.  $^{13}\text{C}$  NMR (75 MHz,  $\text{CD}_3\text{OD}$ ) of **6**.

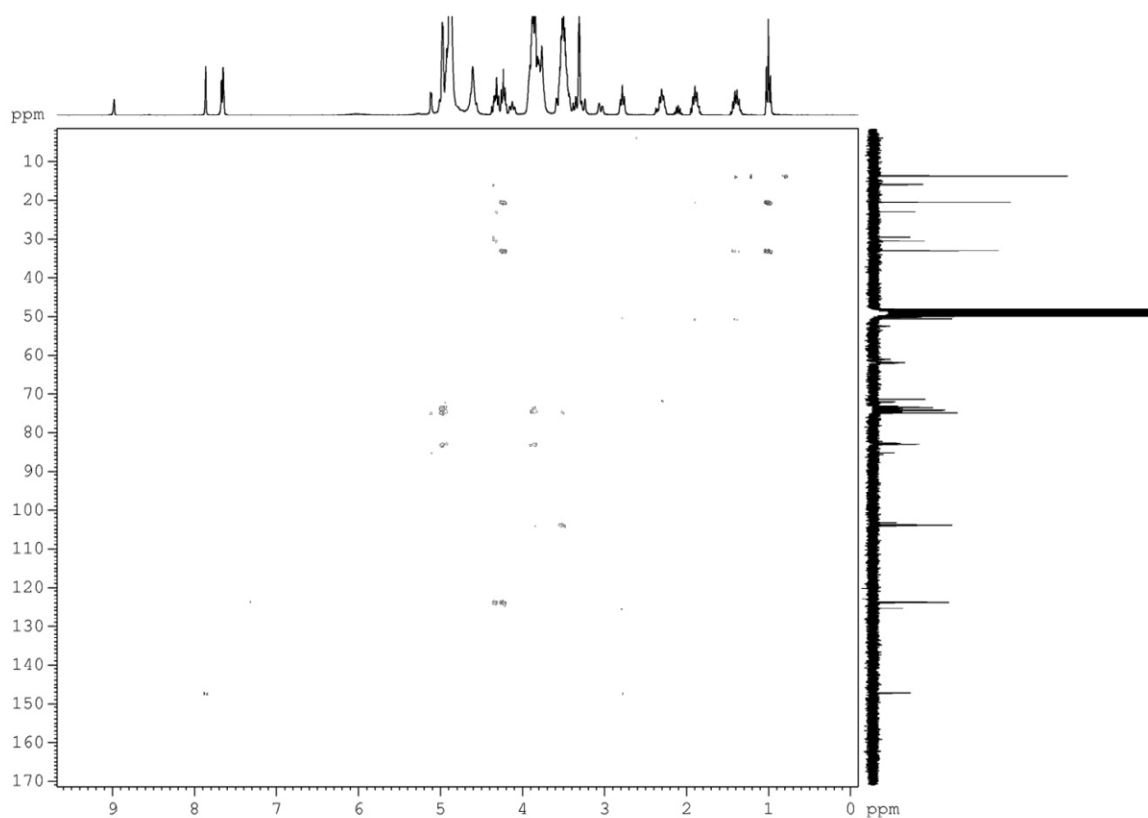

Fig. 52.  $^1\text{H}$ - $^{13}\text{C}$  HMBC (300/75 MHz,  $\text{CD}_3\text{OD}$ ) ( $J_{\text{H-C}} = 8$  Hz) of **6**.

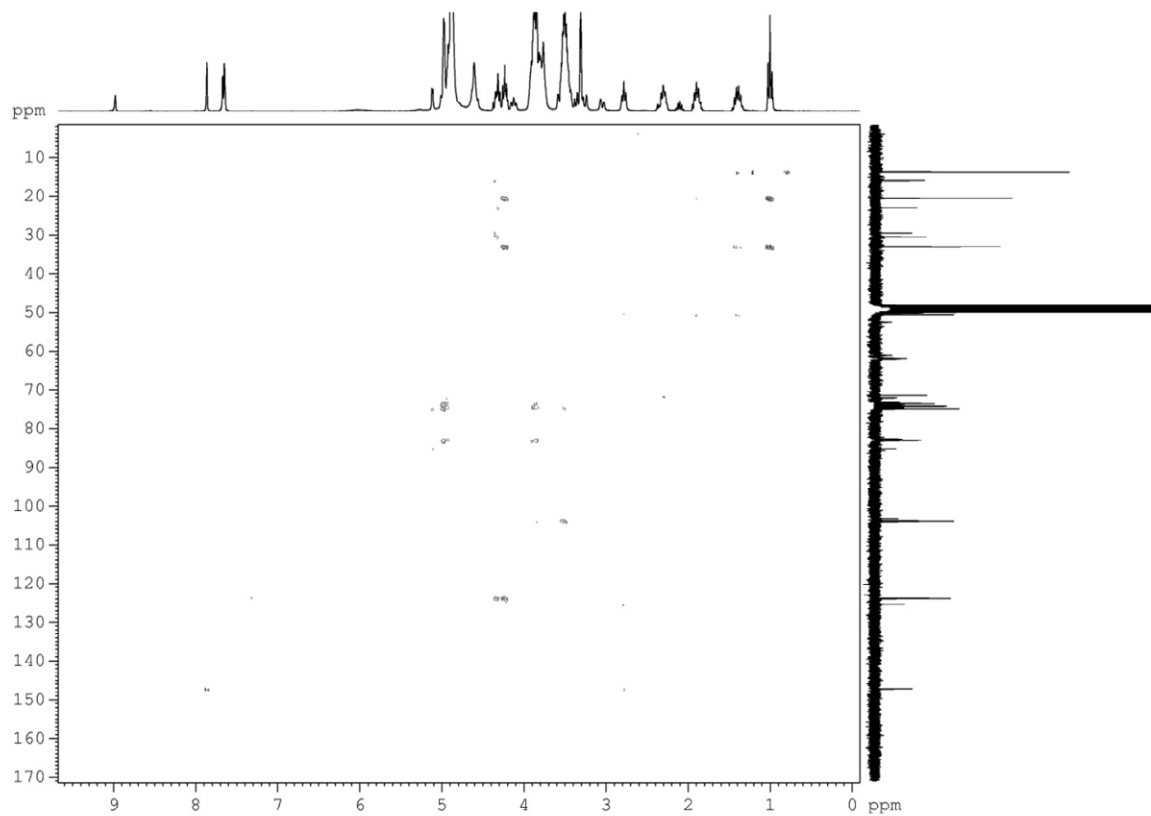

**Fig. 53.**  $^1\text{H}$ - $^{13}\text{C}$  HMBC (300/75 MHz,  $\text{CD}_3\text{OD}$ ) ( $J_{\text{H-C}}^3 = 10$  Hz) of **6**.



## DSC analyses

1-butyl-3-[1-(6<sup>1</sup>-deoxy-6<sup>II-VII</sup>,2<sup>I-VII</sup>,3<sup>I-VII</sup>-*O*-permethyl- $\beta$ -cyclodextrin-6<sup>1</sup>-yl)triazol-4-ylmethyl]imidazolium bromide (8).

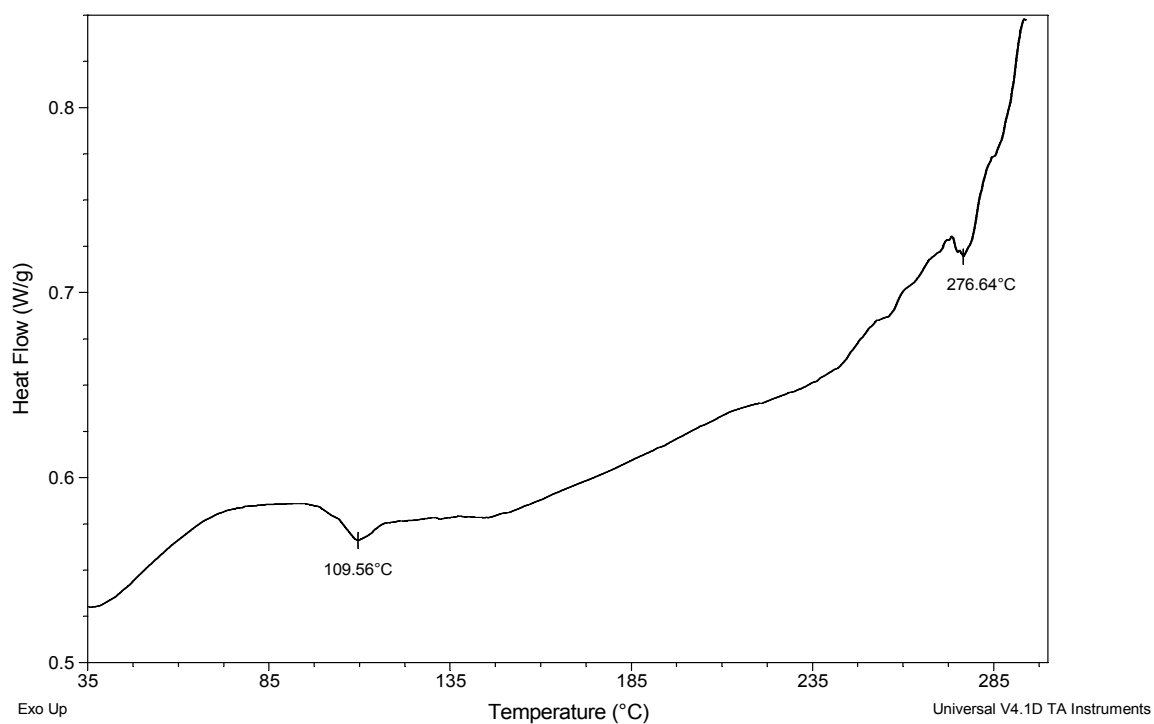

1-butyl-3-[3-(1-(6<sup>1</sup>-deoxy-6<sup>II-VII</sup>,2<sup>I-VII</sup>,3<sup>I-VII</sup>-*O*-permethyl- $\beta$ -cyclodextrin-6<sup>1</sup>-yl)triazol-4-yl)propyl]imidazolium chloride (9).

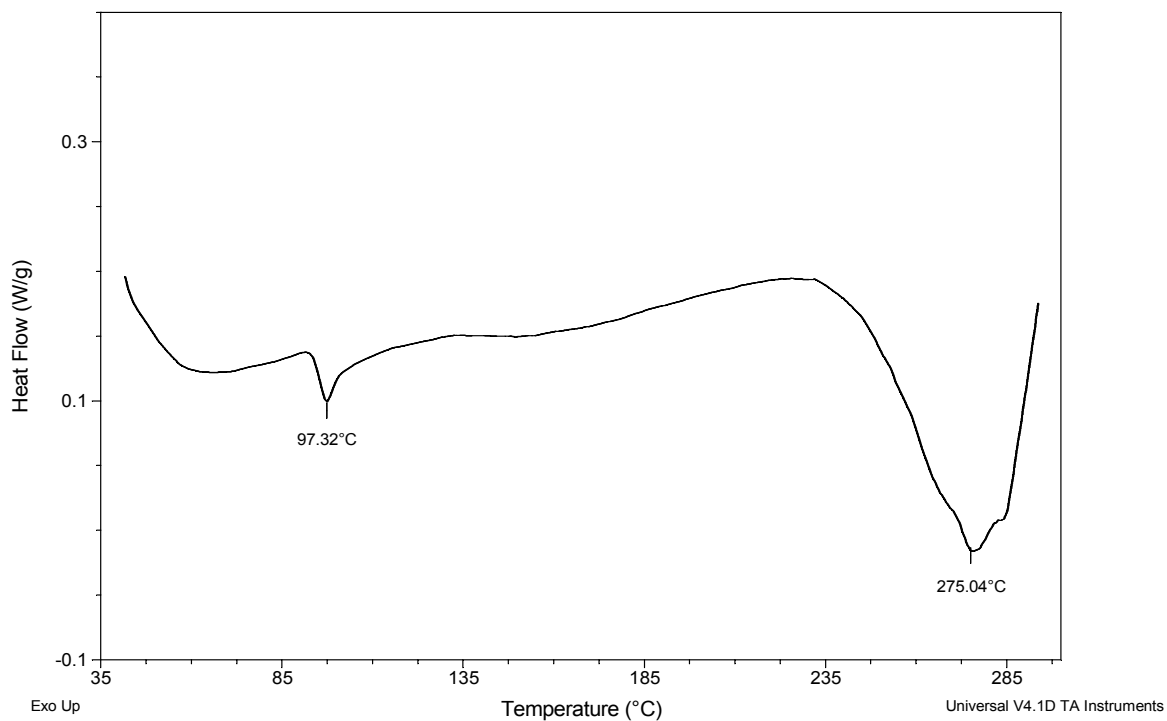

**1-butyl-3-[1-(6<sup>1</sup>-deoxy-6<sup>H-VII</sup>,2<sup>1-VII</sup>,3<sup>1-VII</sup>-*O*-permethyl- $\beta$ -cyclodextrin-6<sup>1</sup>-yl)triazol-4-ylmethyl]imidazolium hexafluorophosphate (10).**

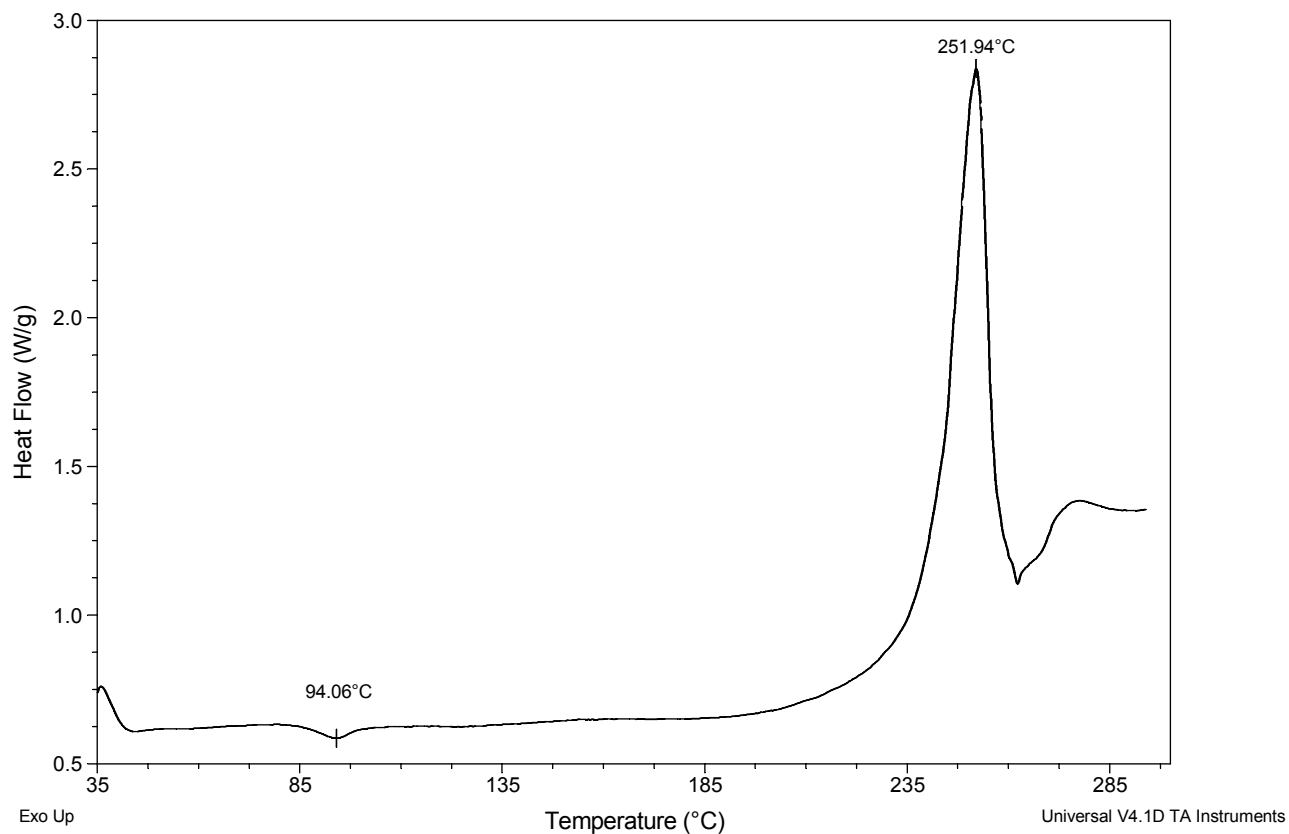

**1-butyl-3-[3-(1-(6<sup>1</sup>-deoxy-6<sup>H-VII</sup>,2<sup>1-VII</sup>,3<sup>1-VII</sup>-*O*-permethyl- $\beta$ -cyclodextrin-6<sup>1</sup>-yl)triazol-4-yl)propyl]imidazolium hexafluorophosphate (11).**

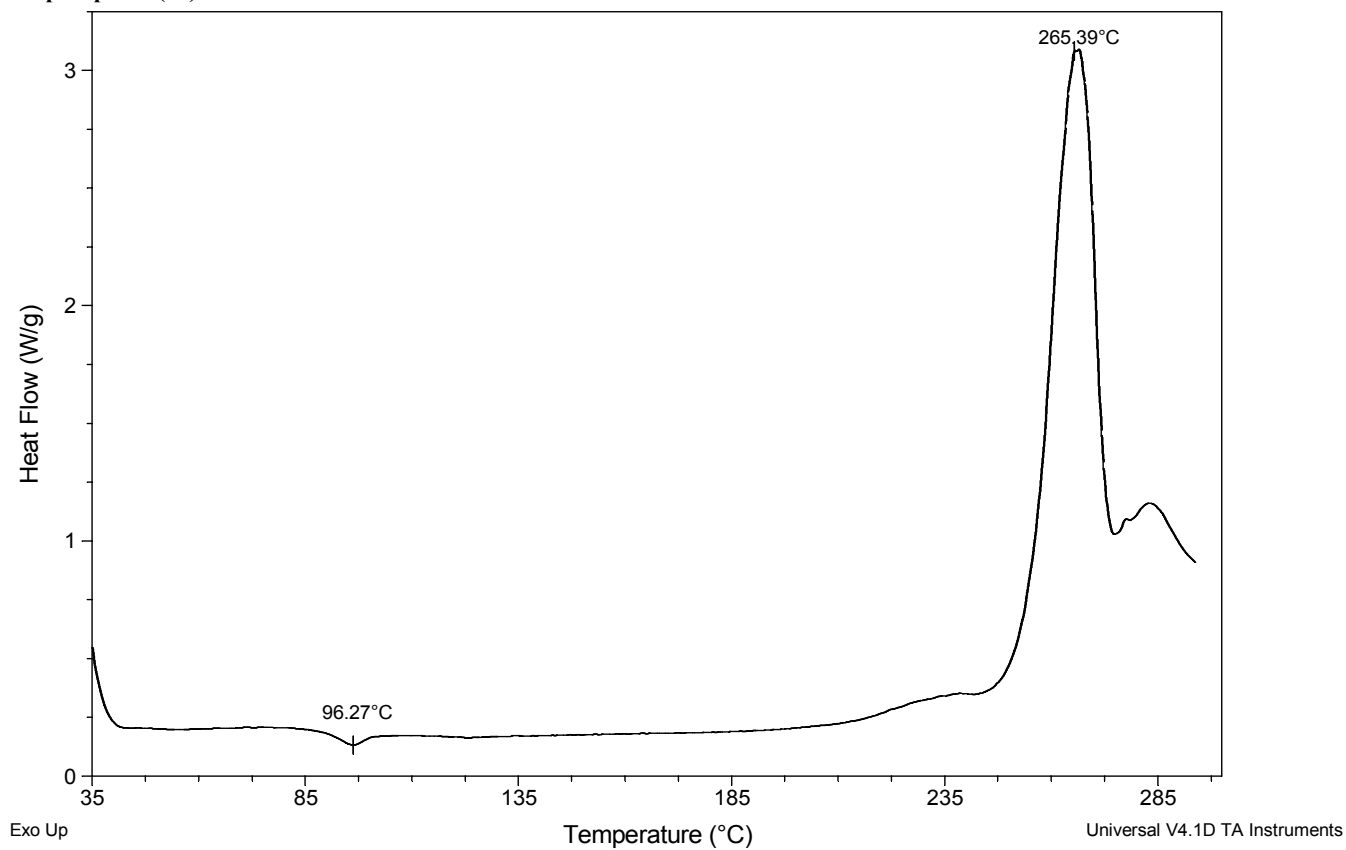

Supplement: c0nj00021c.pdf [file c0nj00021c.pdf]
